# Supplementary material for: Syntheses of sulfur and selenium analogues of pachastrissamine via double displacements of cyclic sulfate
Source: Royal Society of Chemistry journal article supplement (doi:10.1039/c1ob05920c), 2011-01-01

## *Supporting Information*

# **Syntheses of sulfur and selenium analogues of pachastrissamine via double displacements of cyclic sulfate**

**Hongjun Jeon<sup>a</sup>, Hoon Bae<sup>a</sup>, Dong Jae Baek<sup>a</sup>, Young-Shin Kwak<sup>b</sup>, Deukjoon Kim<sup>a</sup>,  
and Sanghee Kim<sup>a,\*</sup>**

<sup>a</sup> College of Pharmacy, Seoul National University, San 56-1, Shilim, Kwanak, Seoul  
151-742, Korea

<sup>b</sup> Korea Research Institute of Bioscience & Biotechnology (KRIBB), Chungbuk 363-  
883, Korea

*pennkim@snu.ac.kr*

## **Contents**

|                                                                          |         |
|--------------------------------------------------------------------------|---------|
| <sup>1</sup> H NMR and <sup>13</sup> C NMR spectra of compound <b>7</b>  | S3-S4   |
| <sup>1</sup> H NMR and <sup>13</sup> C NMR spectra of compound <b>8</b>  | S5-S6   |
| <sup>1</sup> H NMR and <sup>13</sup> C NMR spectra of compound <b>9</b>  | S7-S8   |
| <sup>1</sup> H NMR and <sup>13</sup> C NMR spectra of compound <b>10</b> | S9-S10  |
| <sup>1</sup> H NMR and <sup>13</sup> C NMR spectra of compound <b>11</b> | S11-S12 |
| <sup>1</sup> H NMR and <sup>13</sup> C NMR spectra of compound <b>12</b> | S13-S14 |
| <sup>1</sup> H NMR and <sup>13</sup> C NMR spectra of compound <b>15</b> | S15-S16 |
| <sup>1</sup> H NMR and <sup>13</sup> C NMR spectra of compound <b>16</b> | S17-S18 |
| <sup>1</sup> H NMR and <sup>13</sup> C NMR spectra of compound <b>17</b> | S19-S20 |
| <sup>1</sup> H NMR and <sup>13</sup> C NMR spectra of compound <b>18</b> | S21-S22 |

|                                                                       |         |
|-----------------------------------------------------------------------|---------|
| $^1\text{H}$ NMR and $^{13}\text{C}$ NMR spectra of compound <b>4</b> | S23-S24 |
| $^1\text{H}$ NMR and $^{13}\text{C}$ NMR spectra of compound <b>5</b> | S25-S26 |

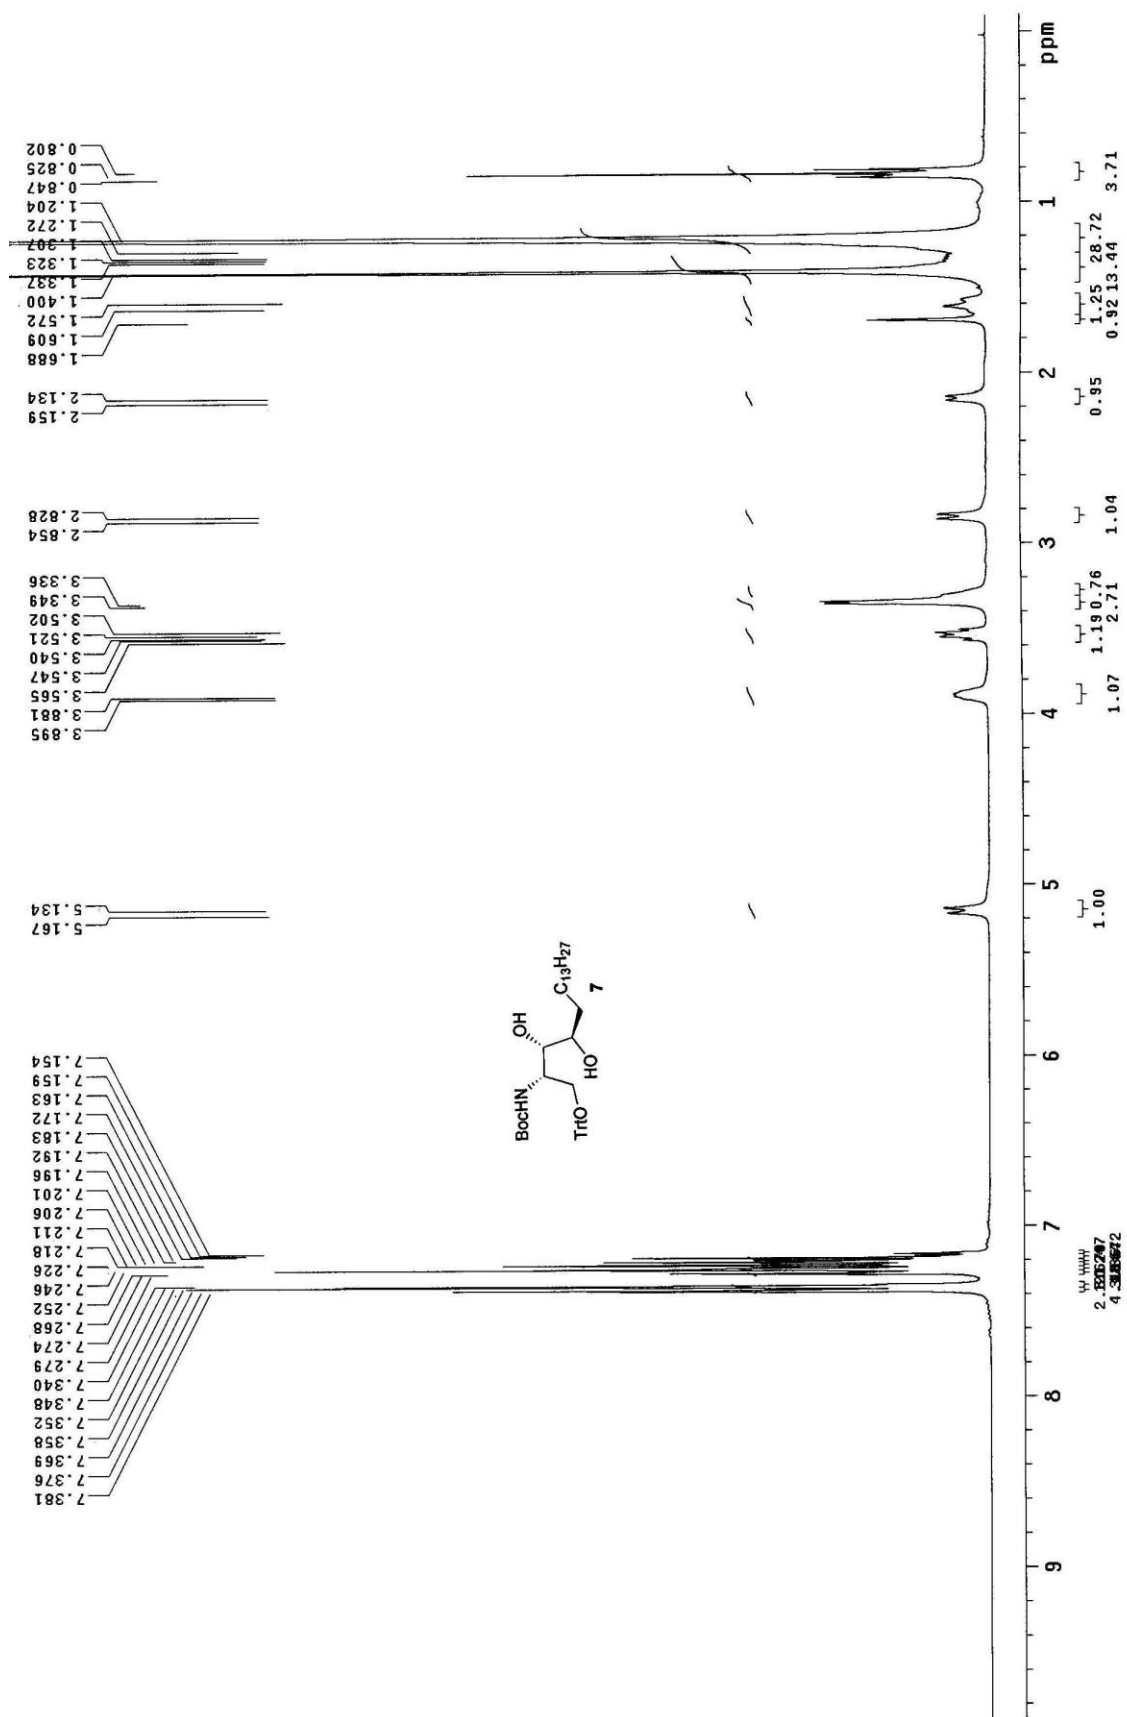

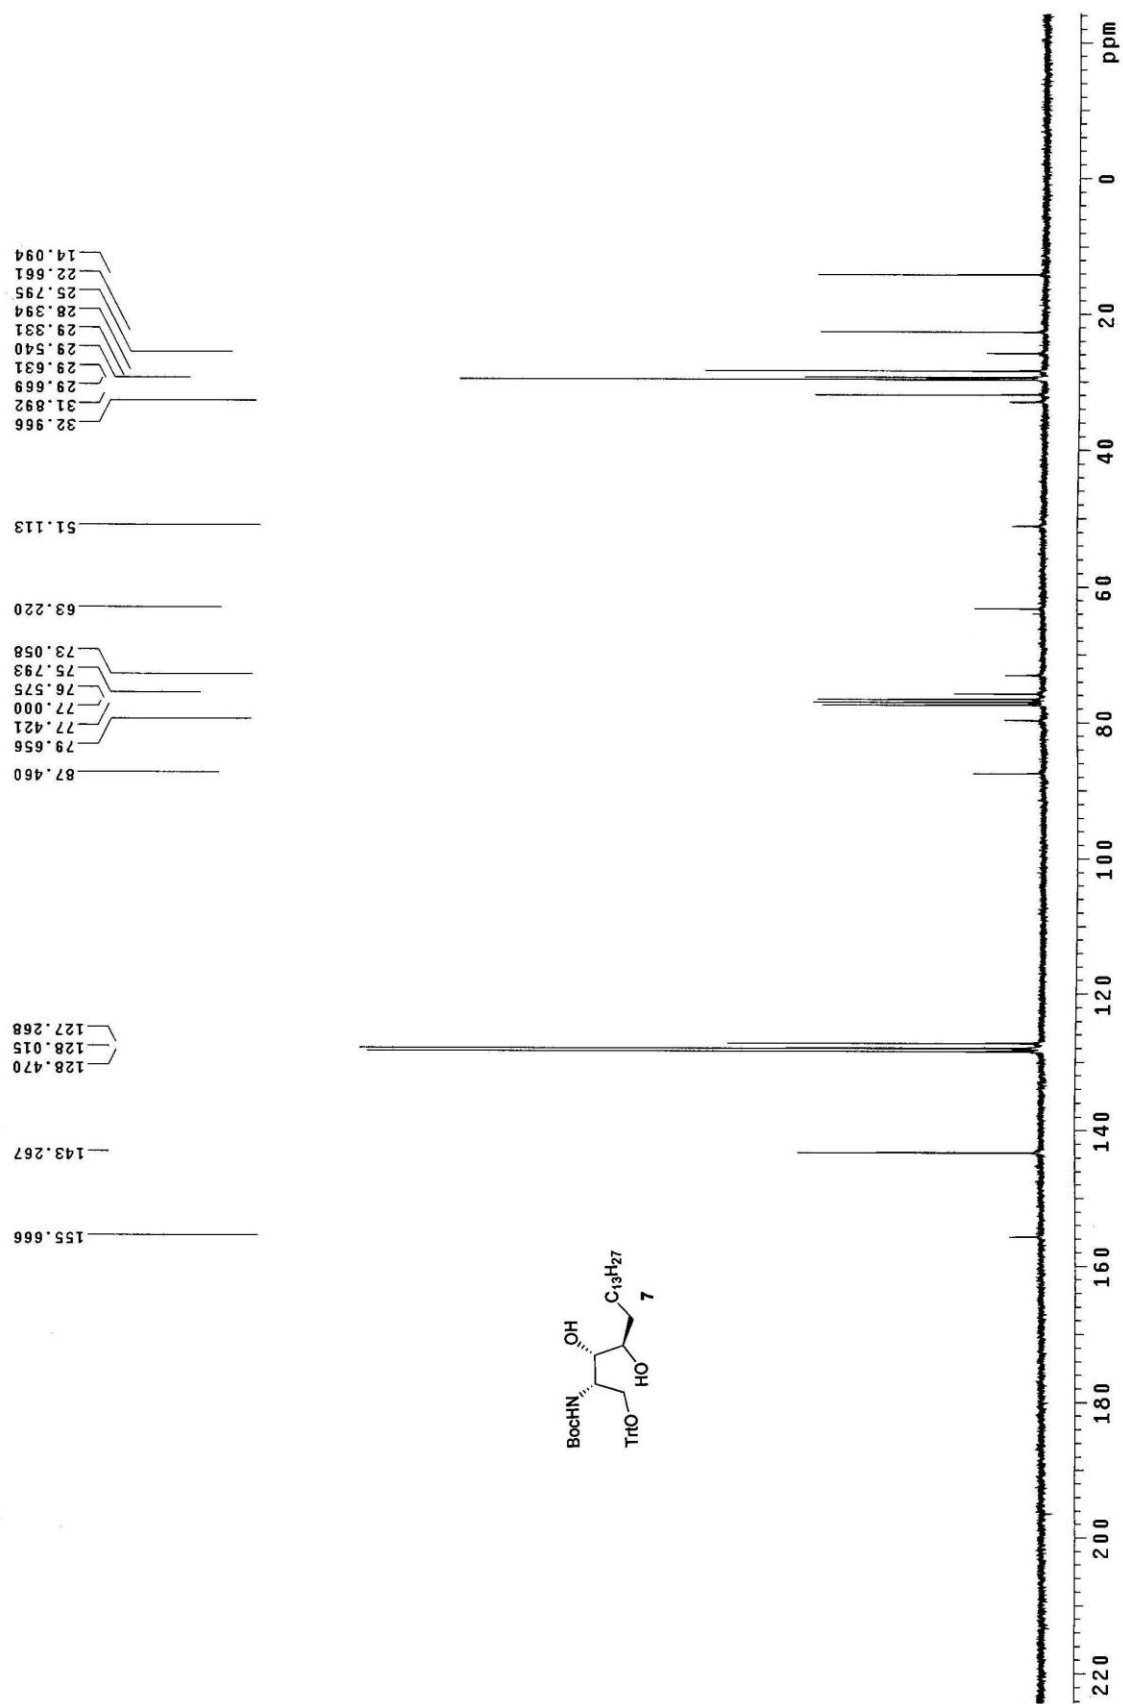

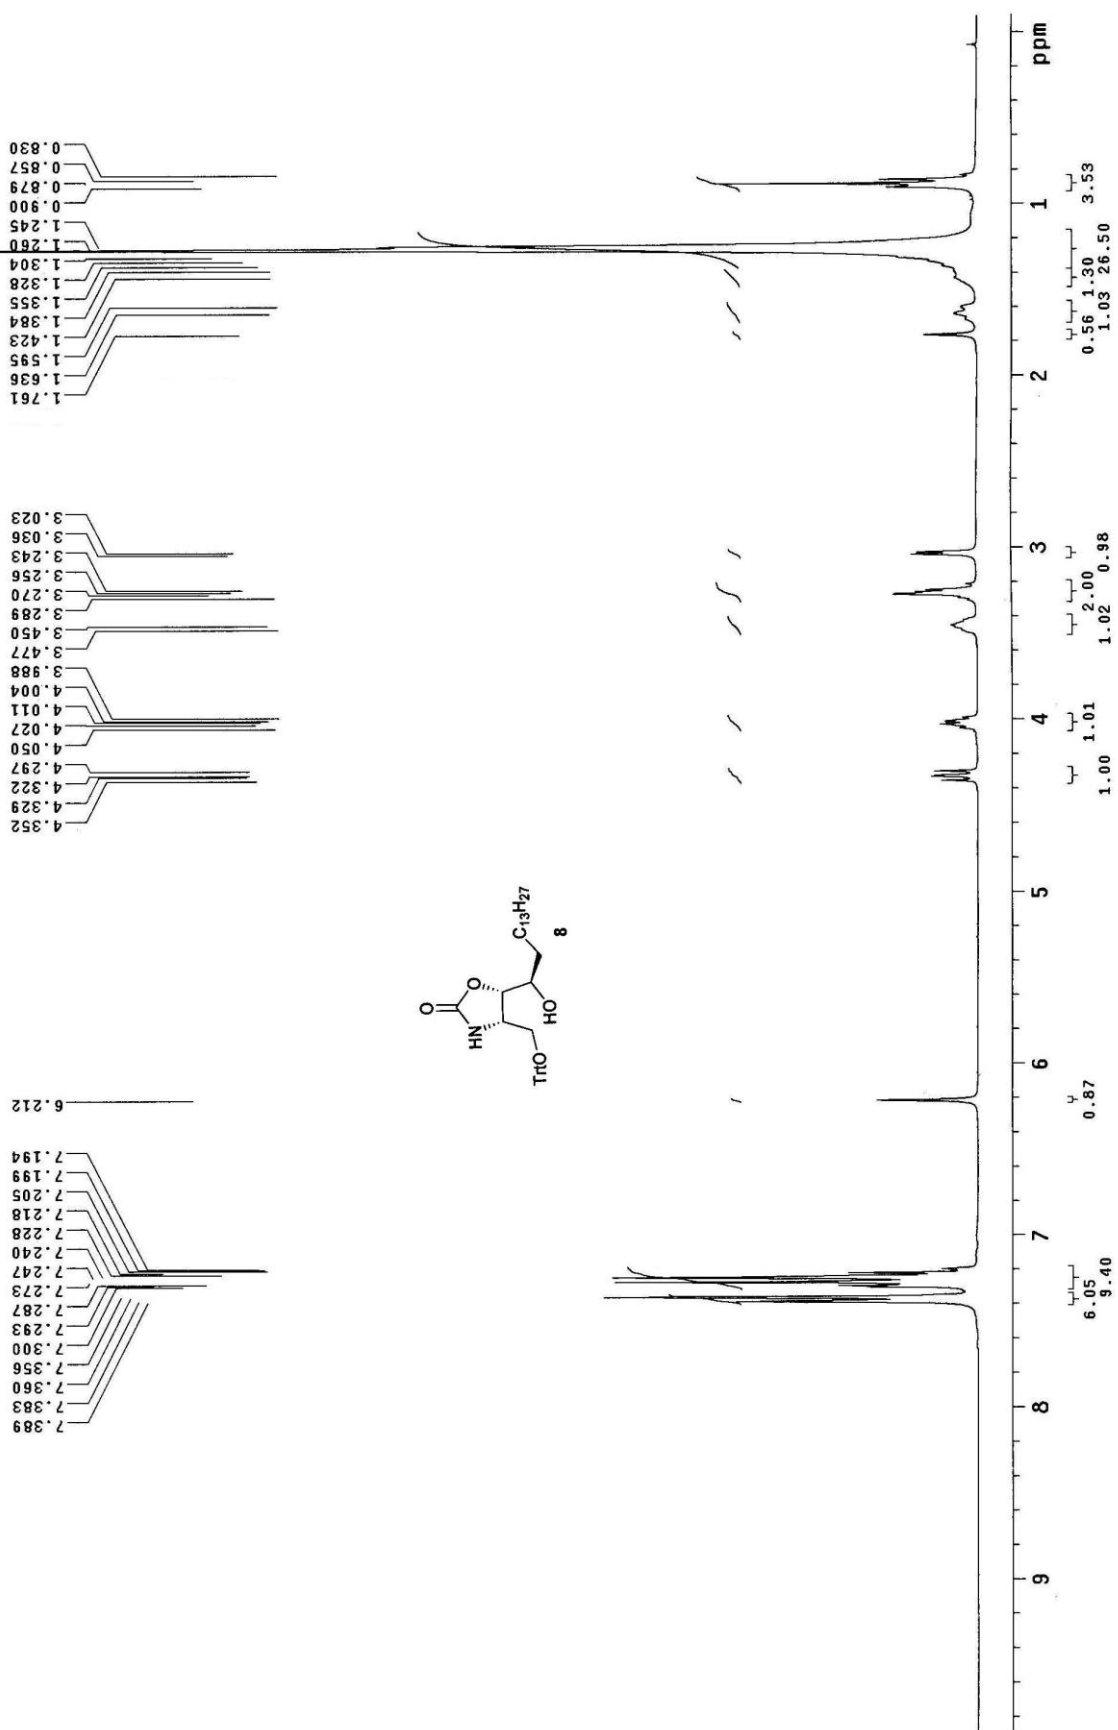

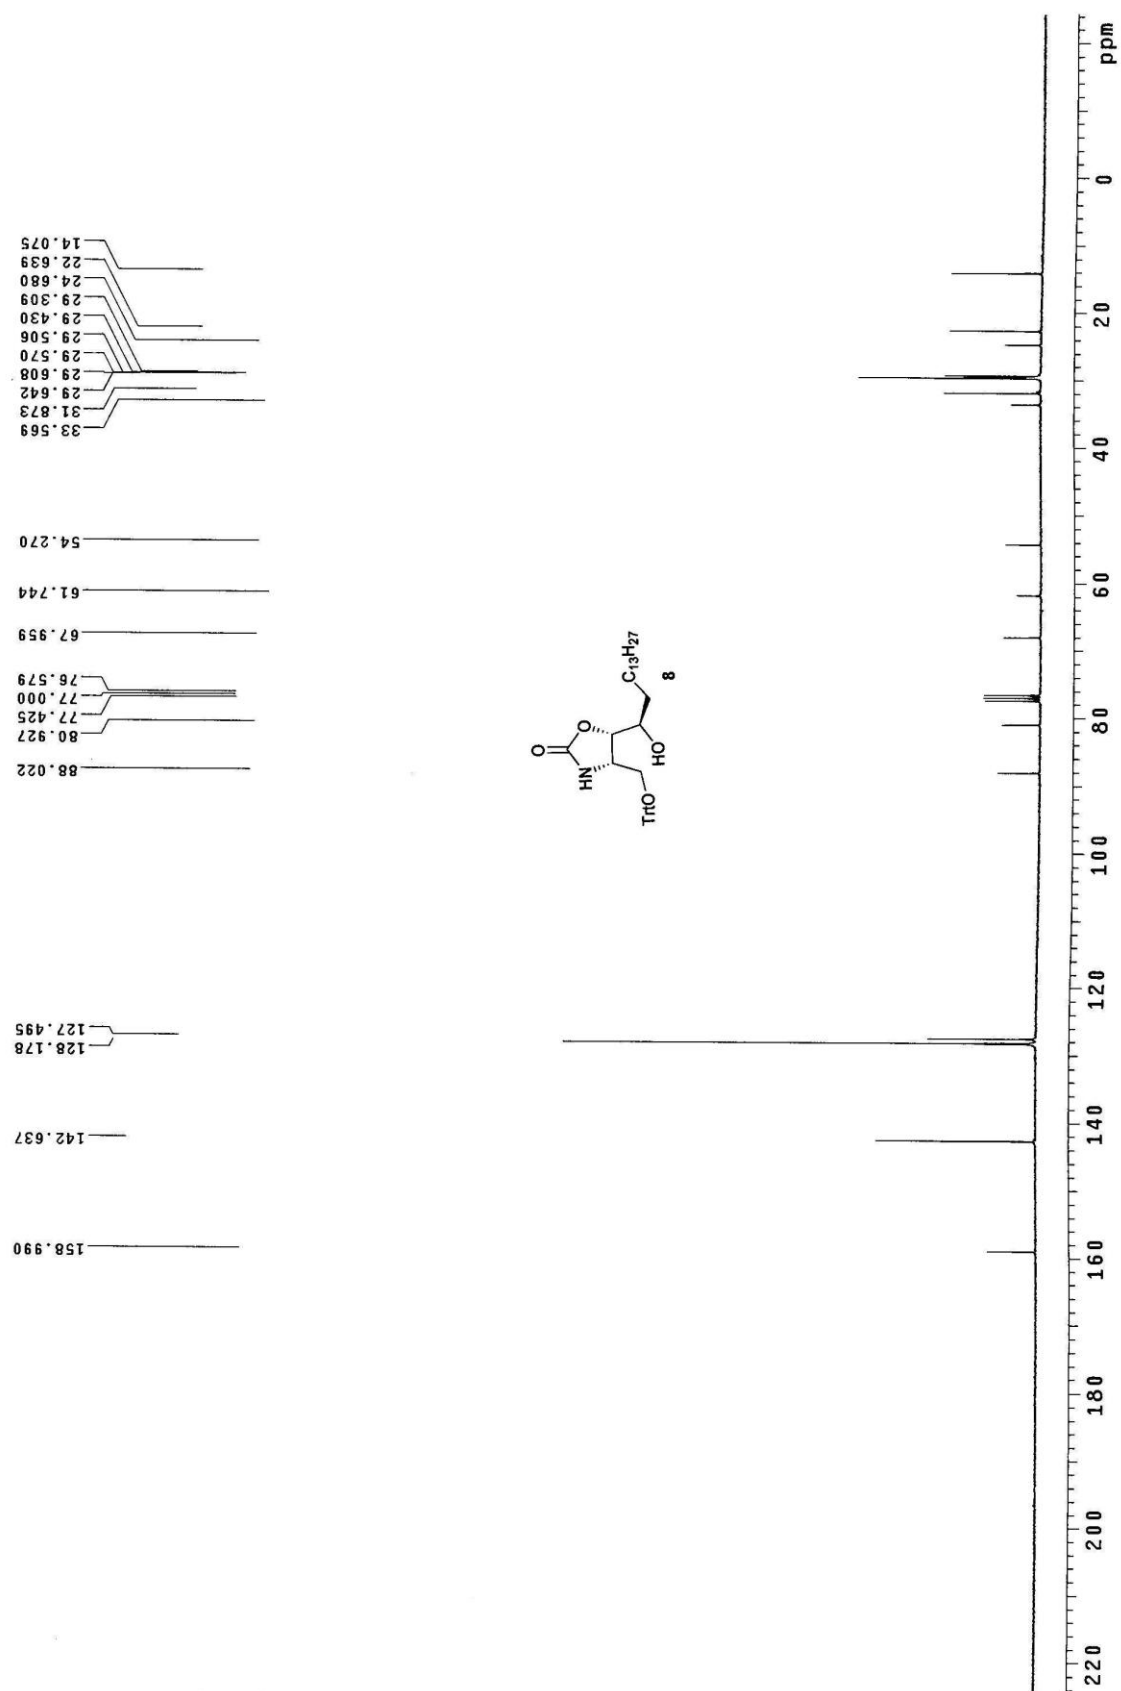

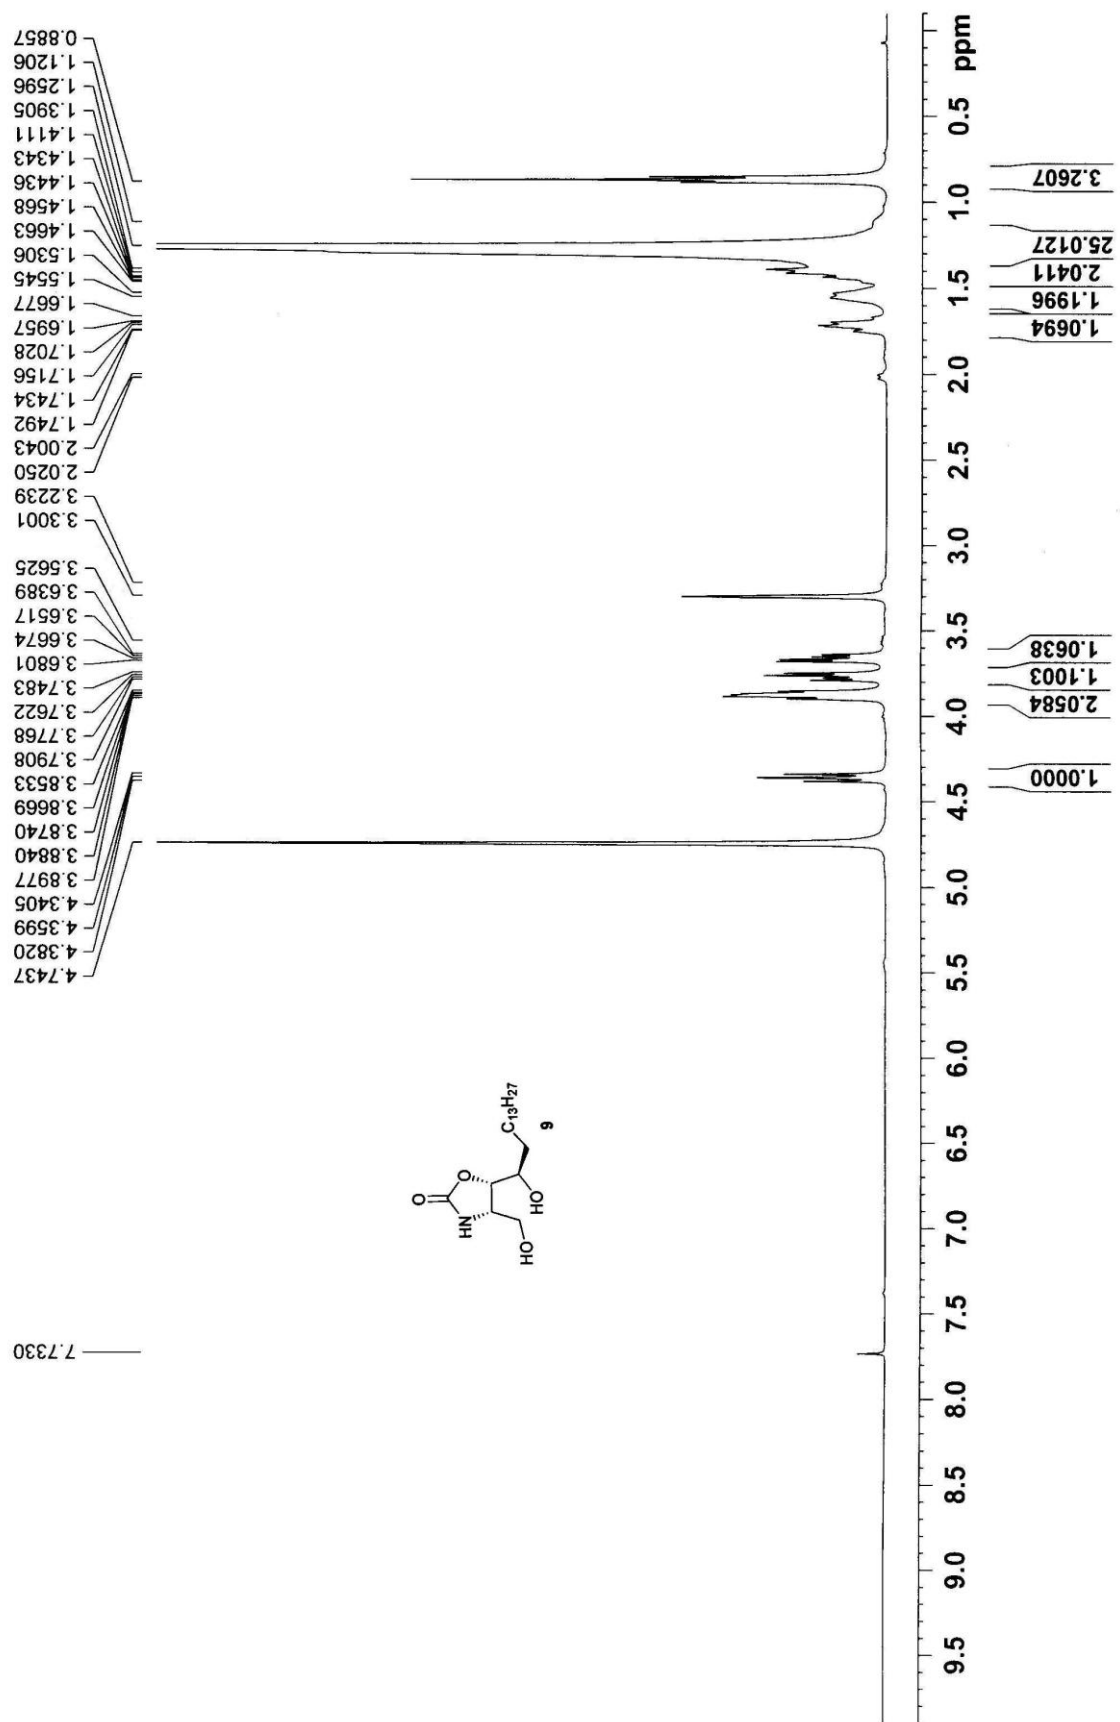

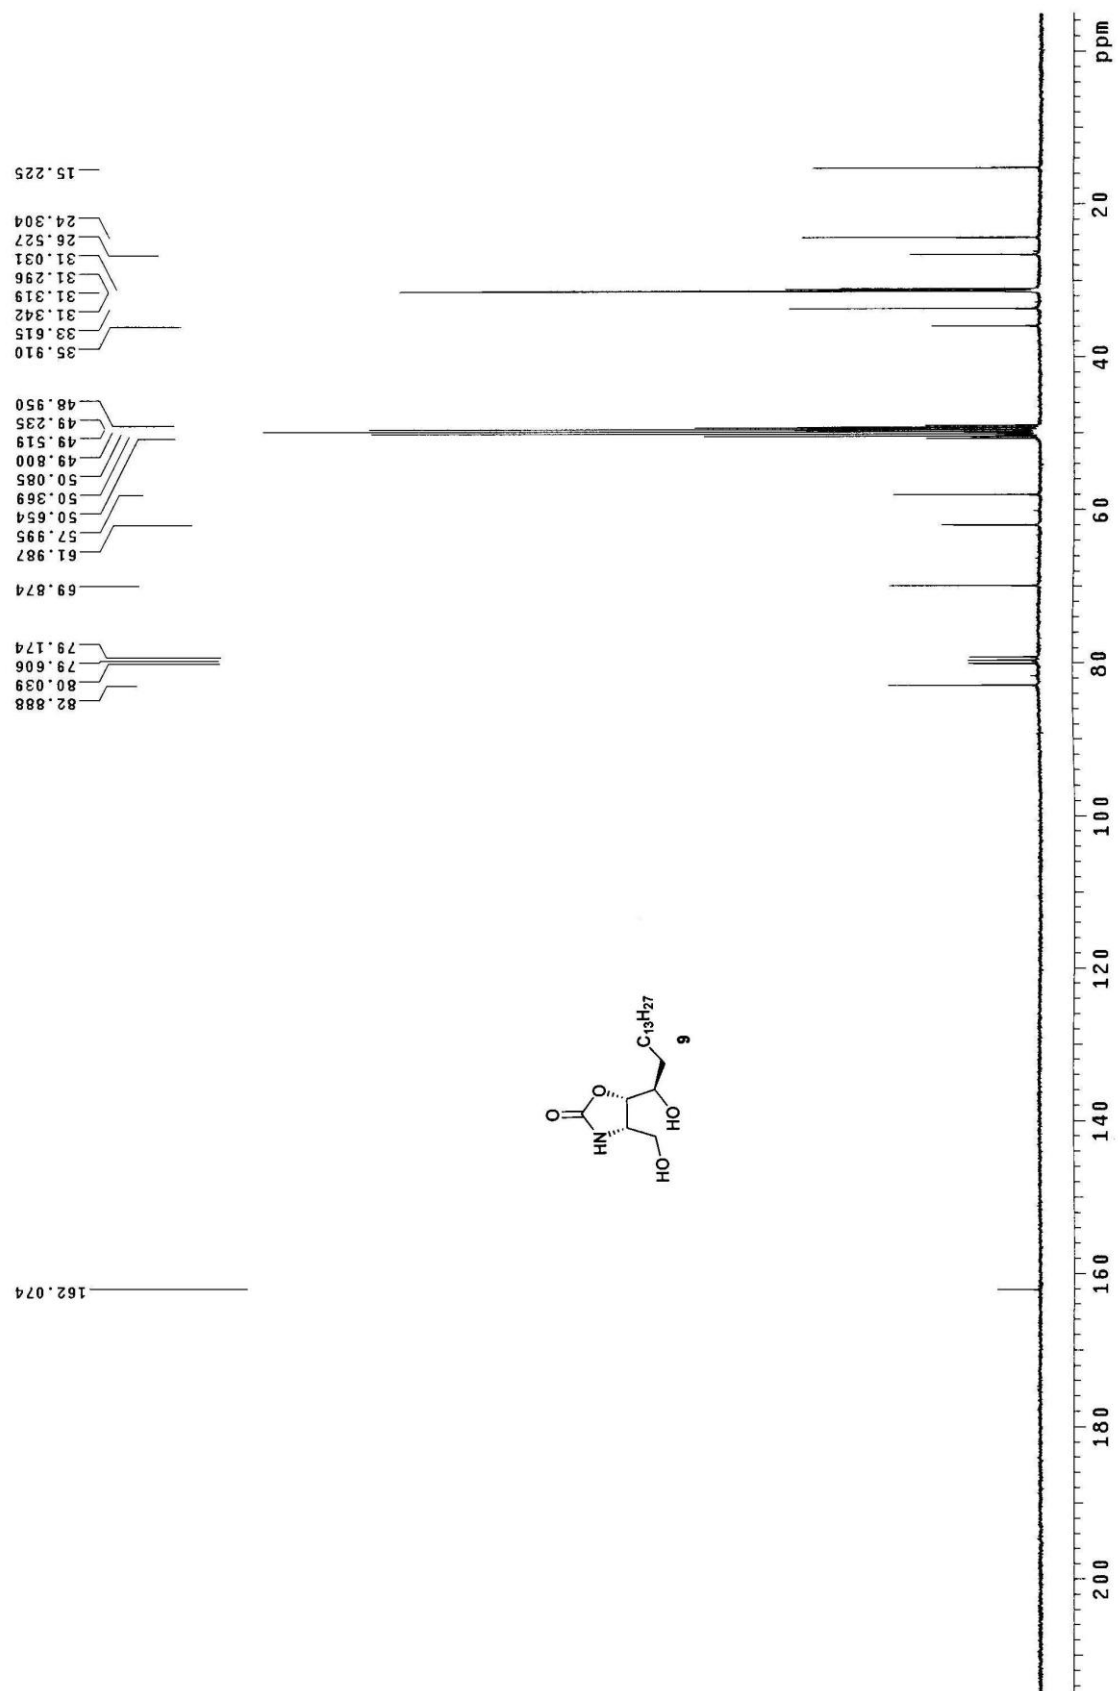



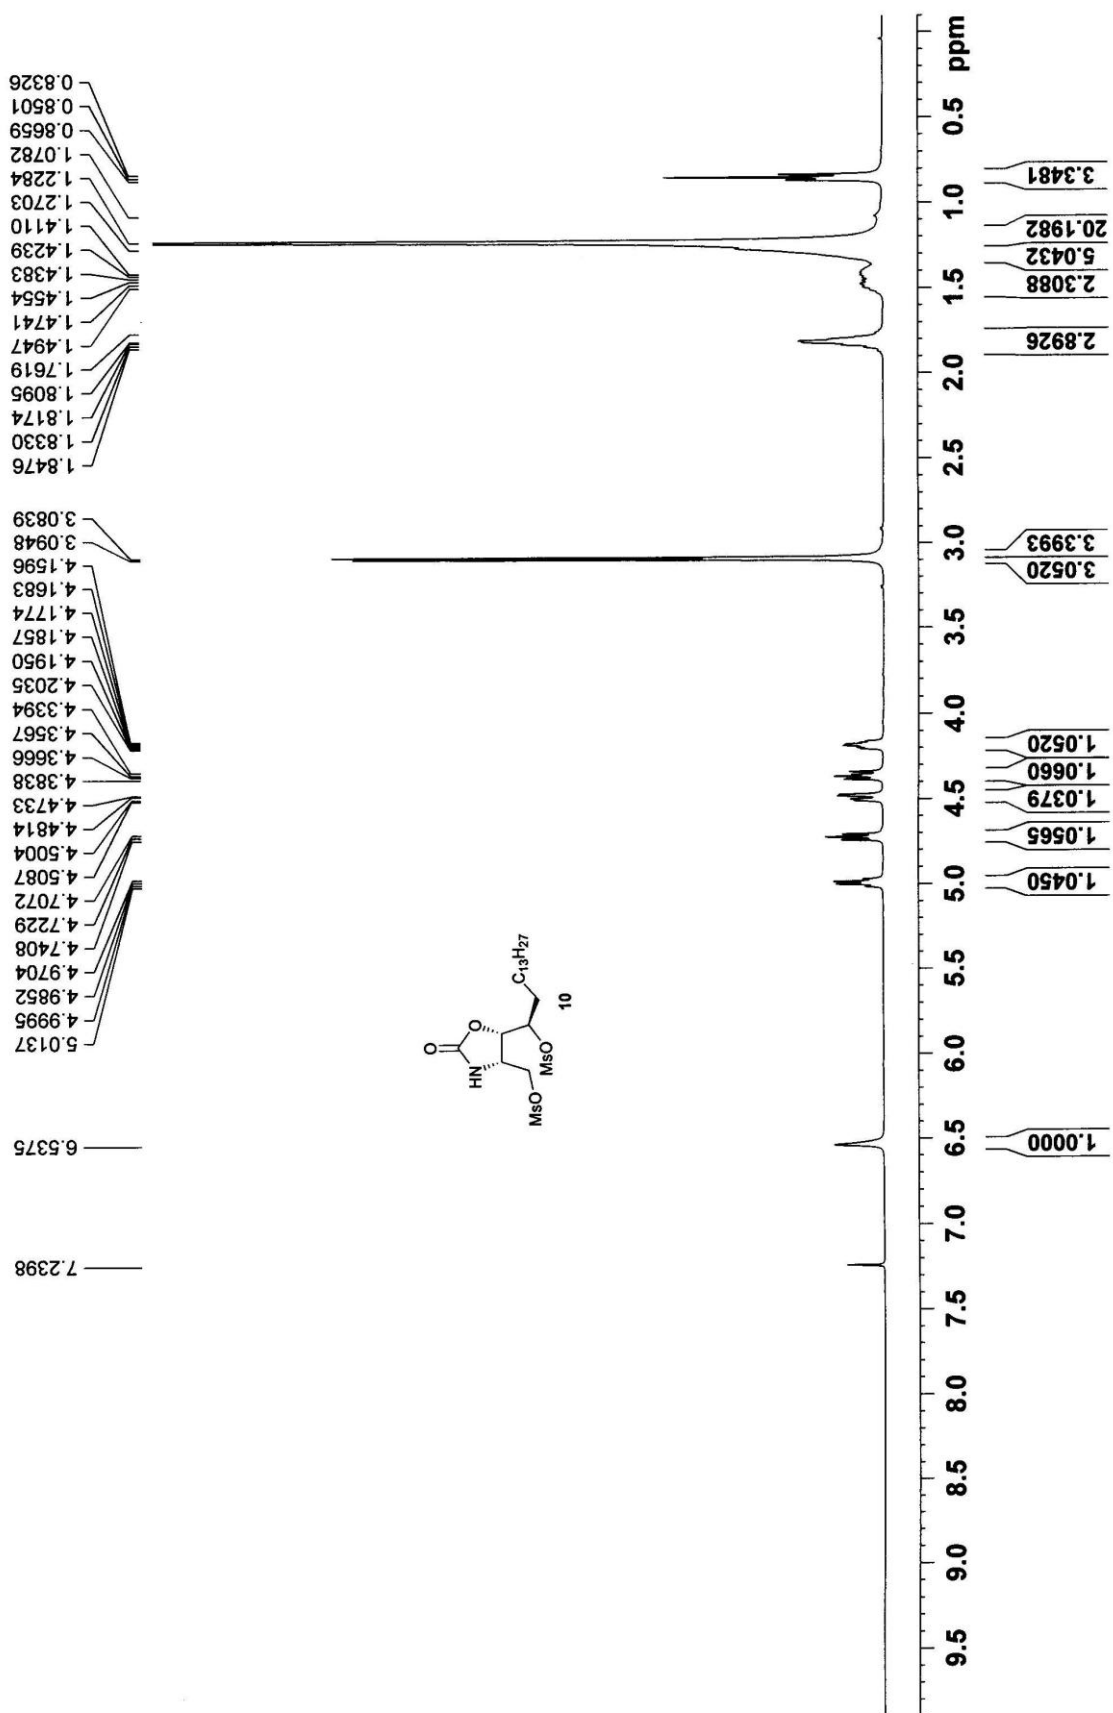

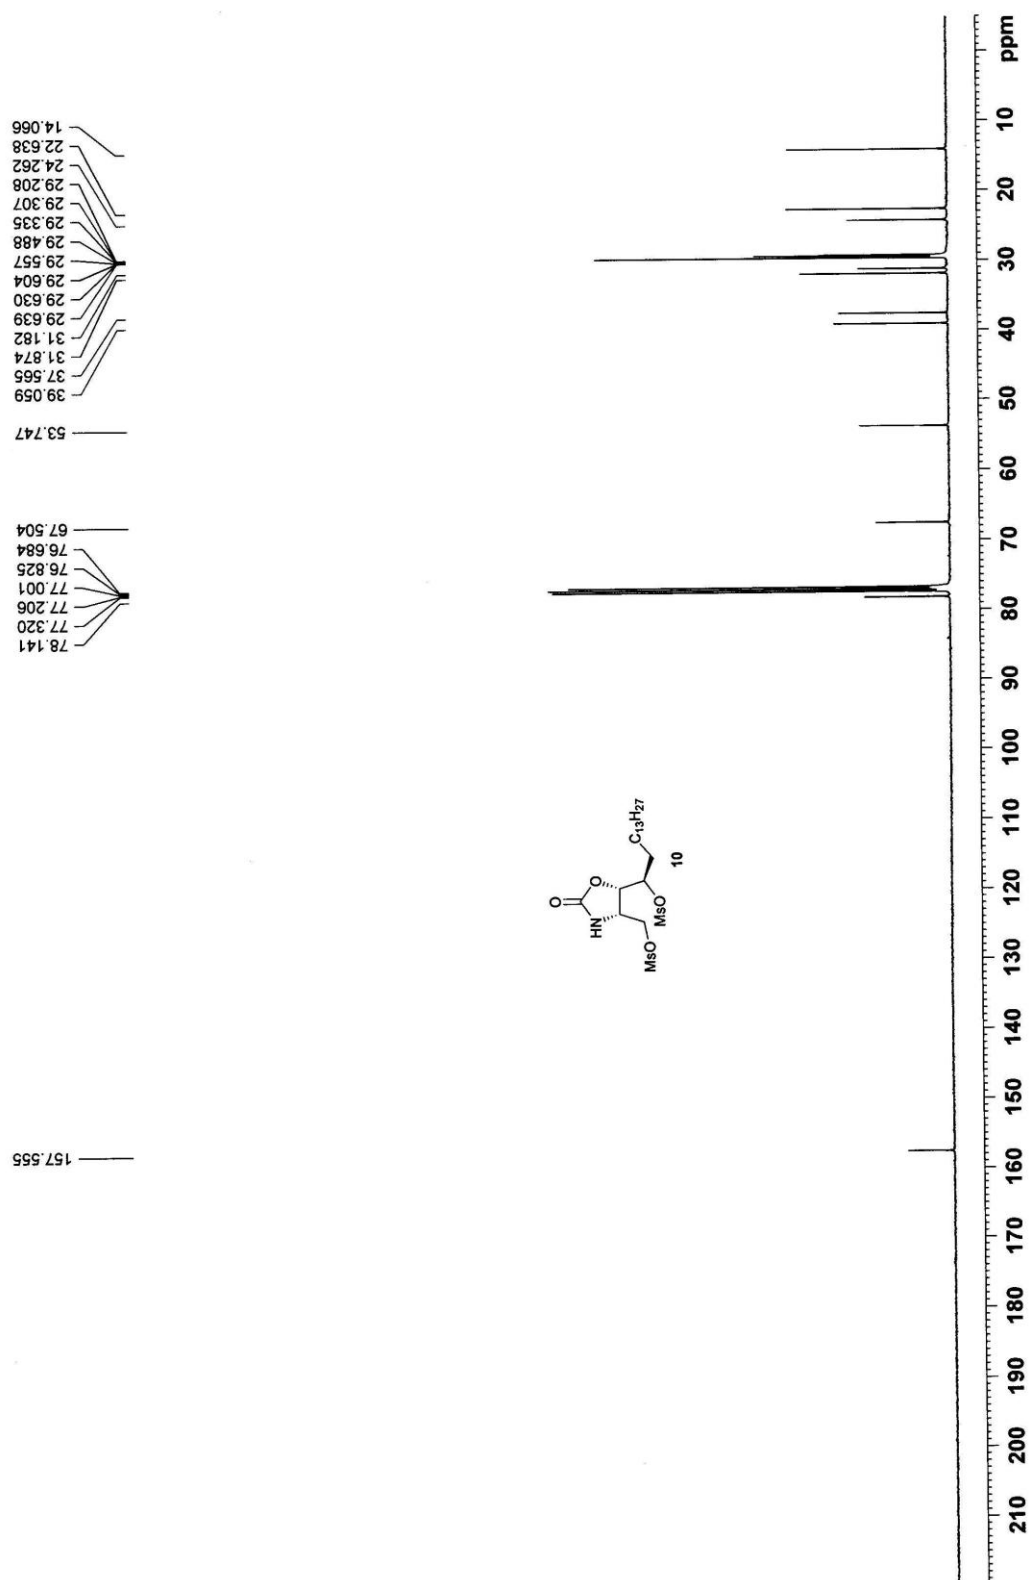

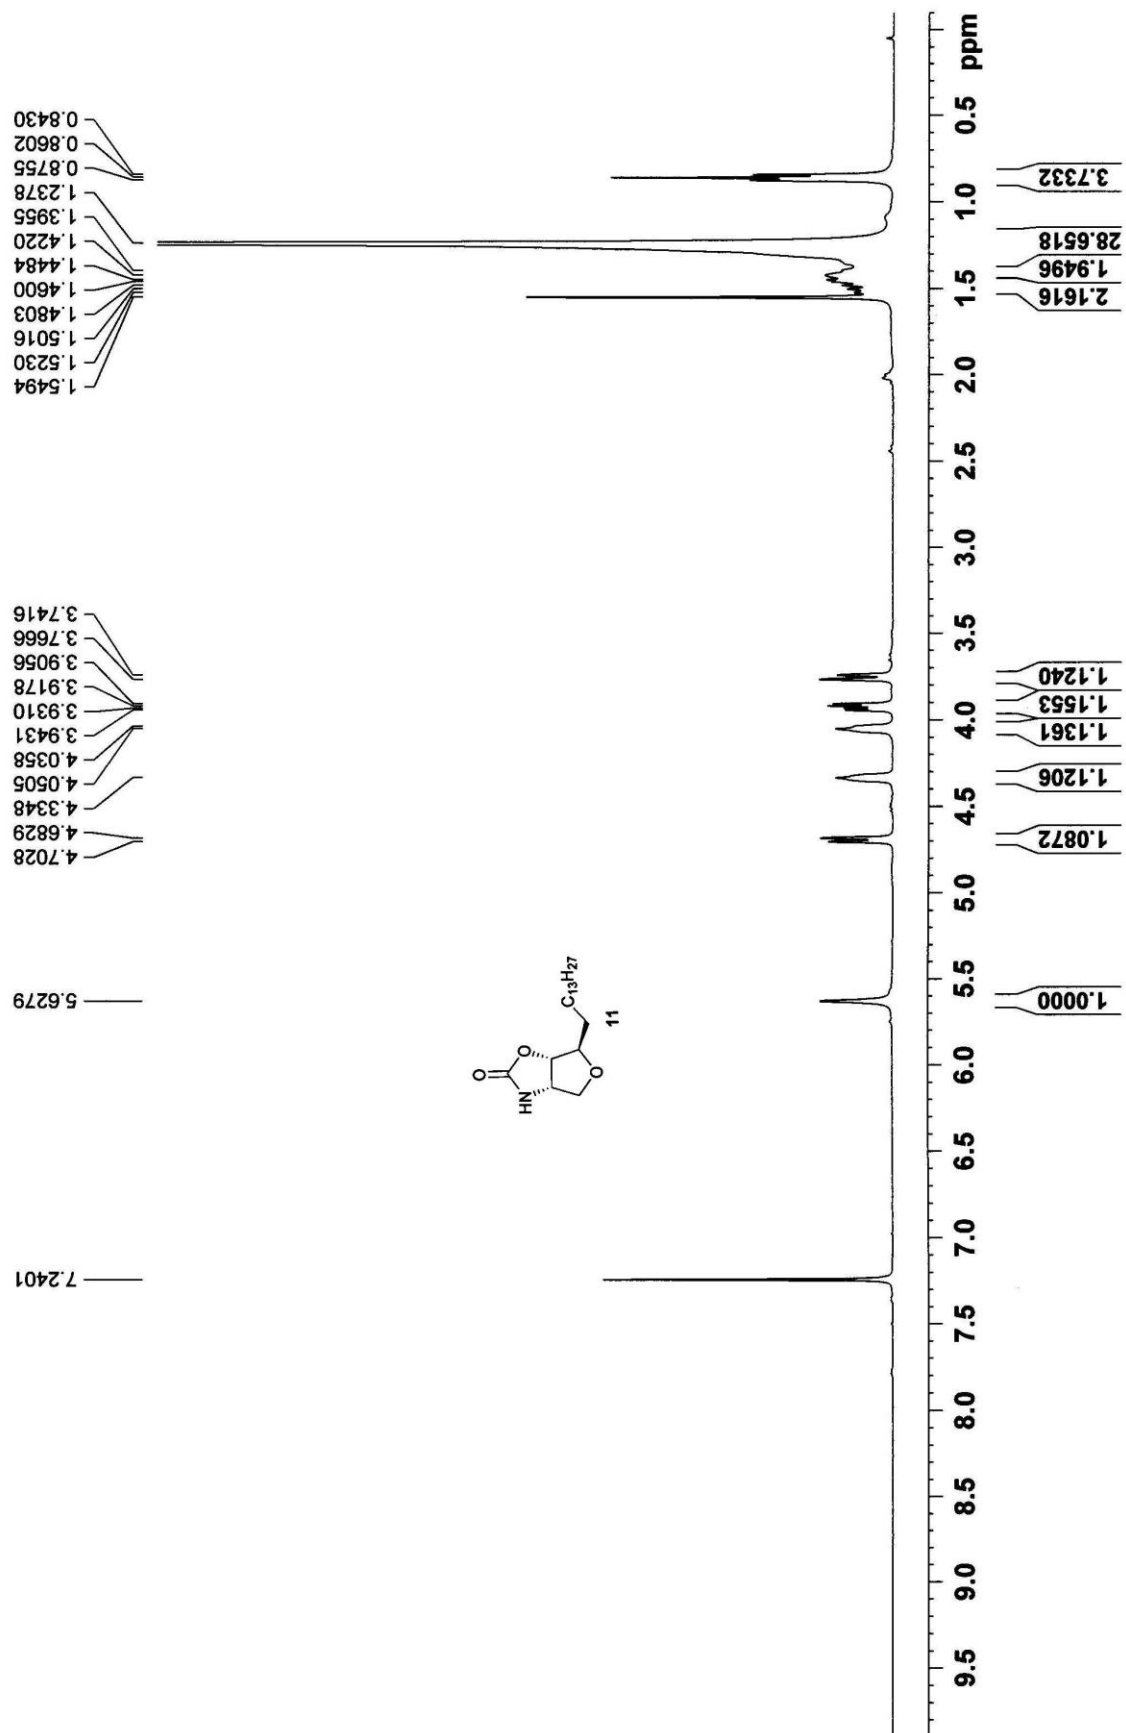

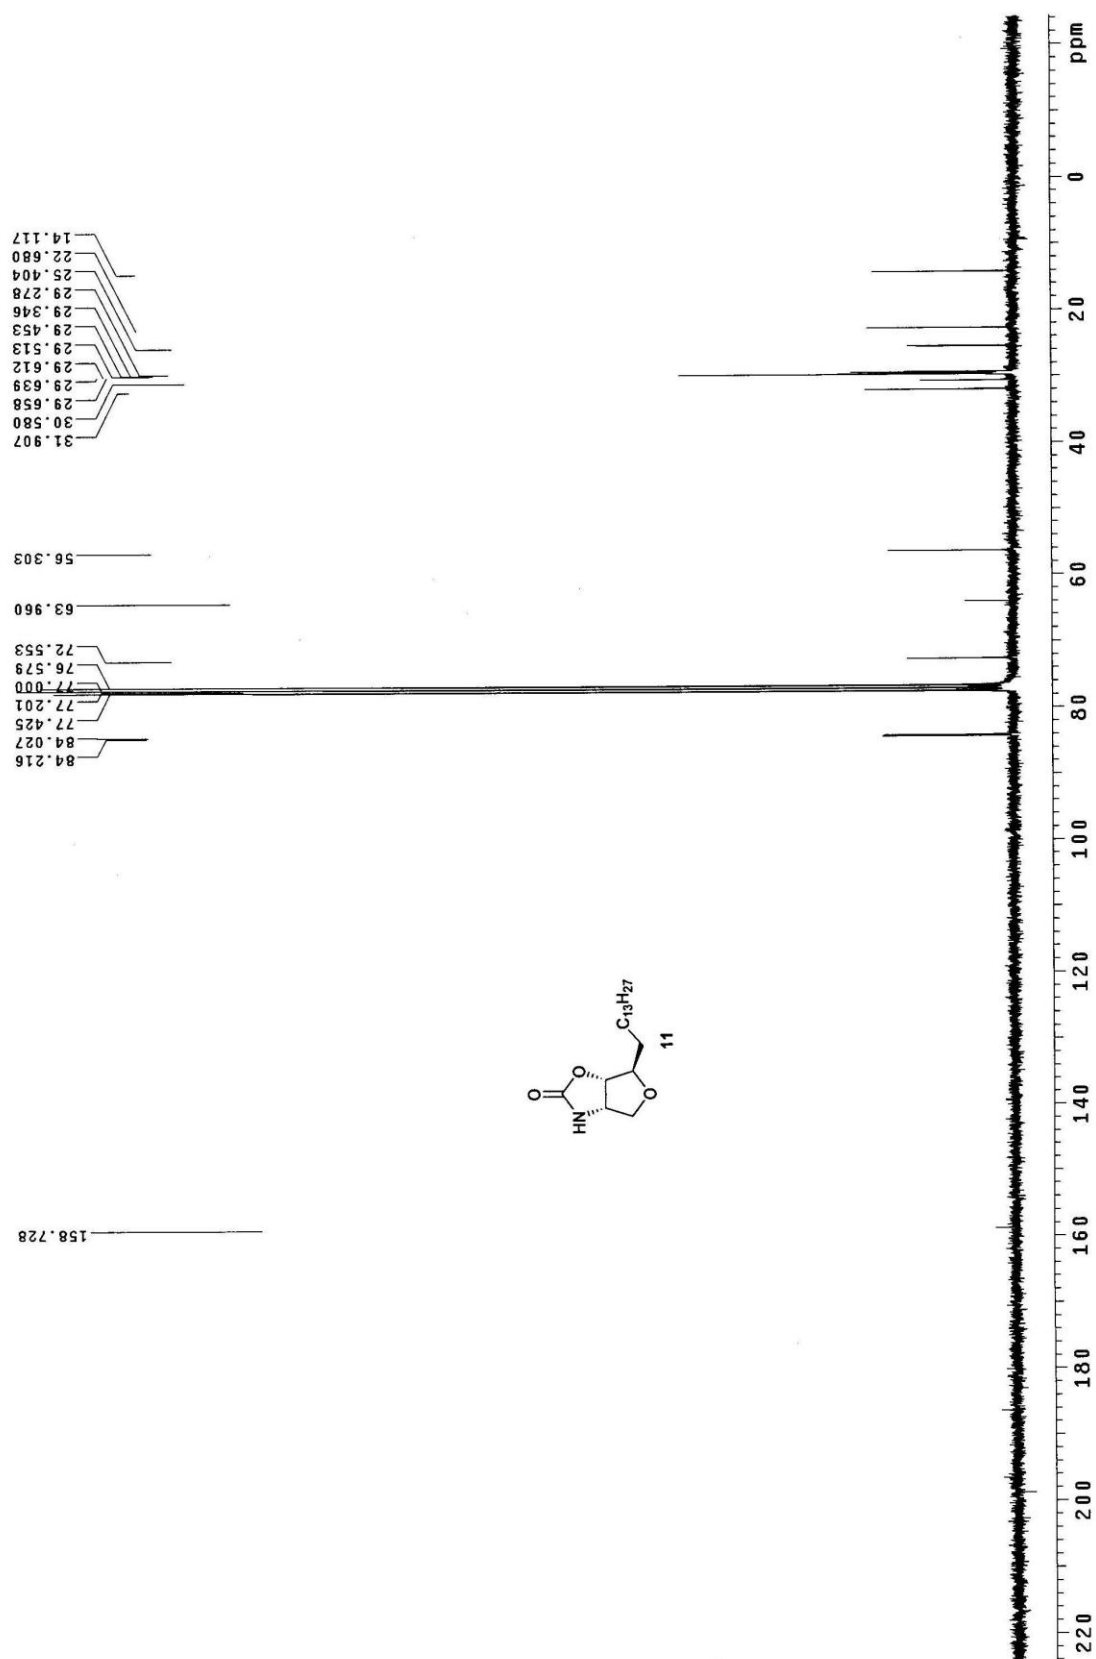

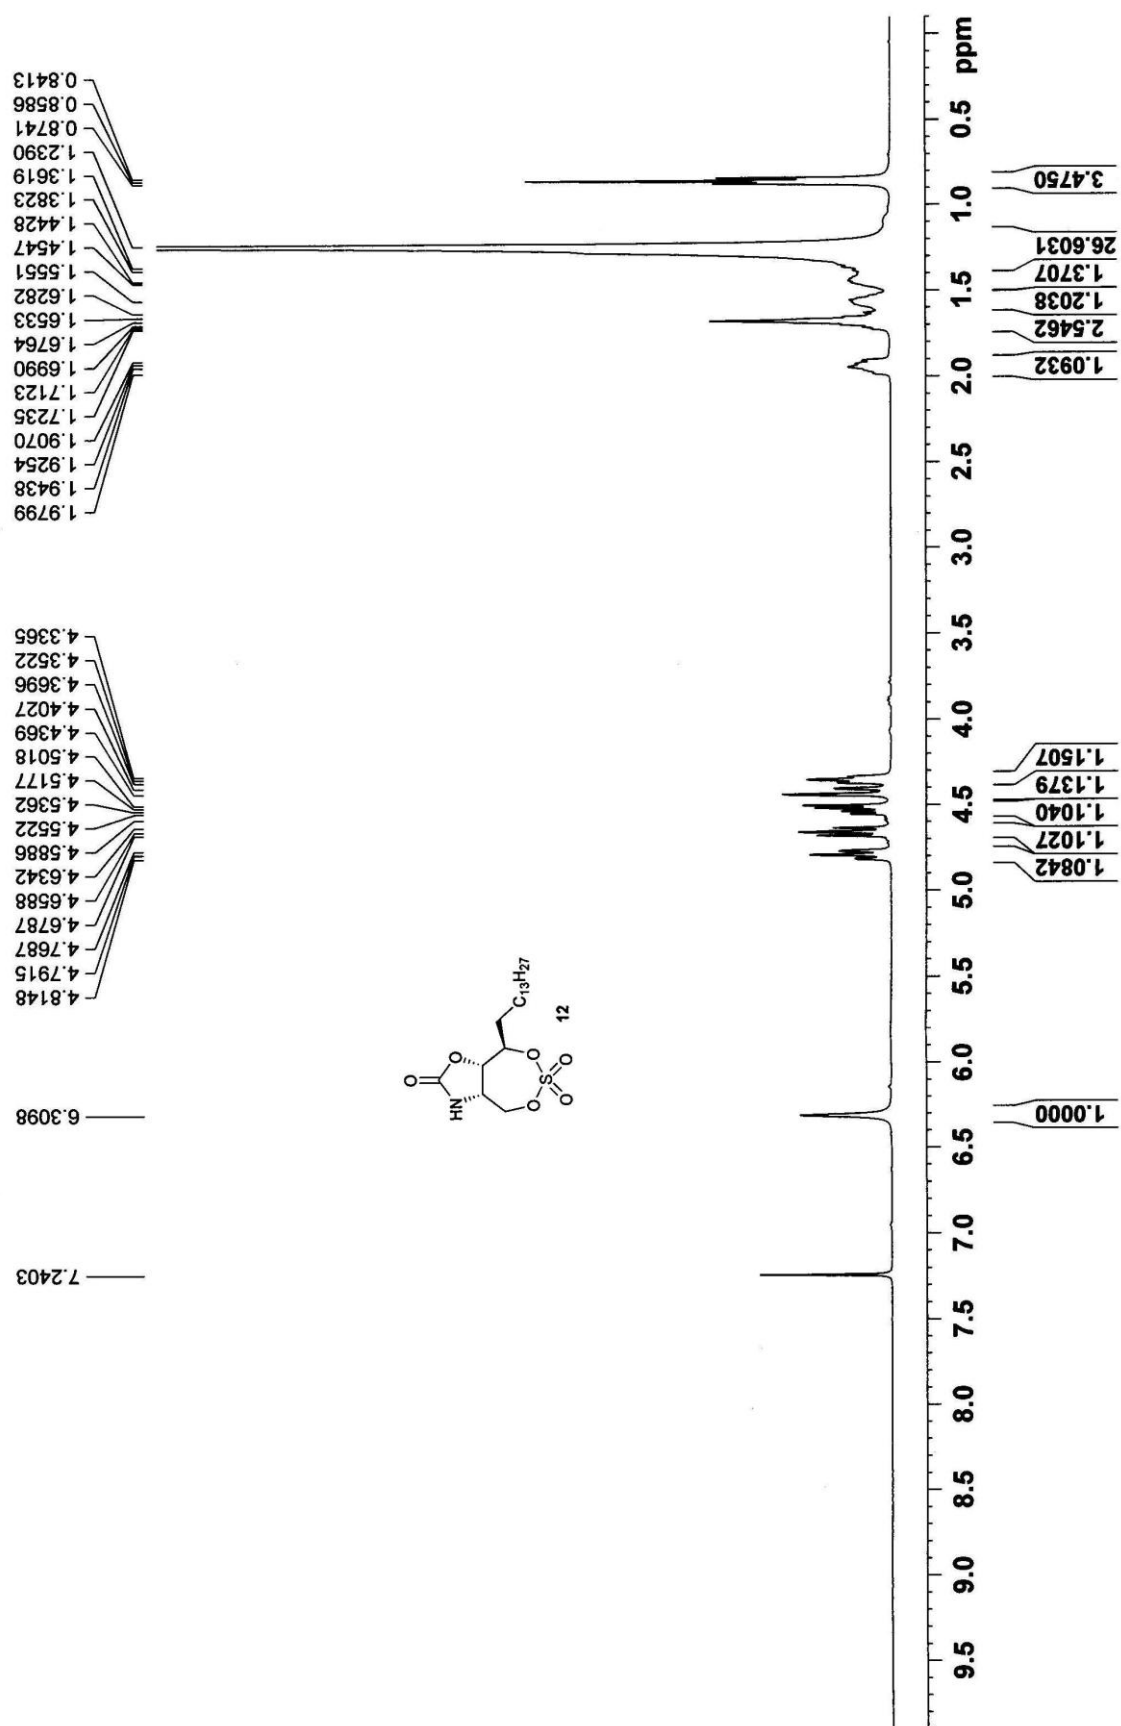

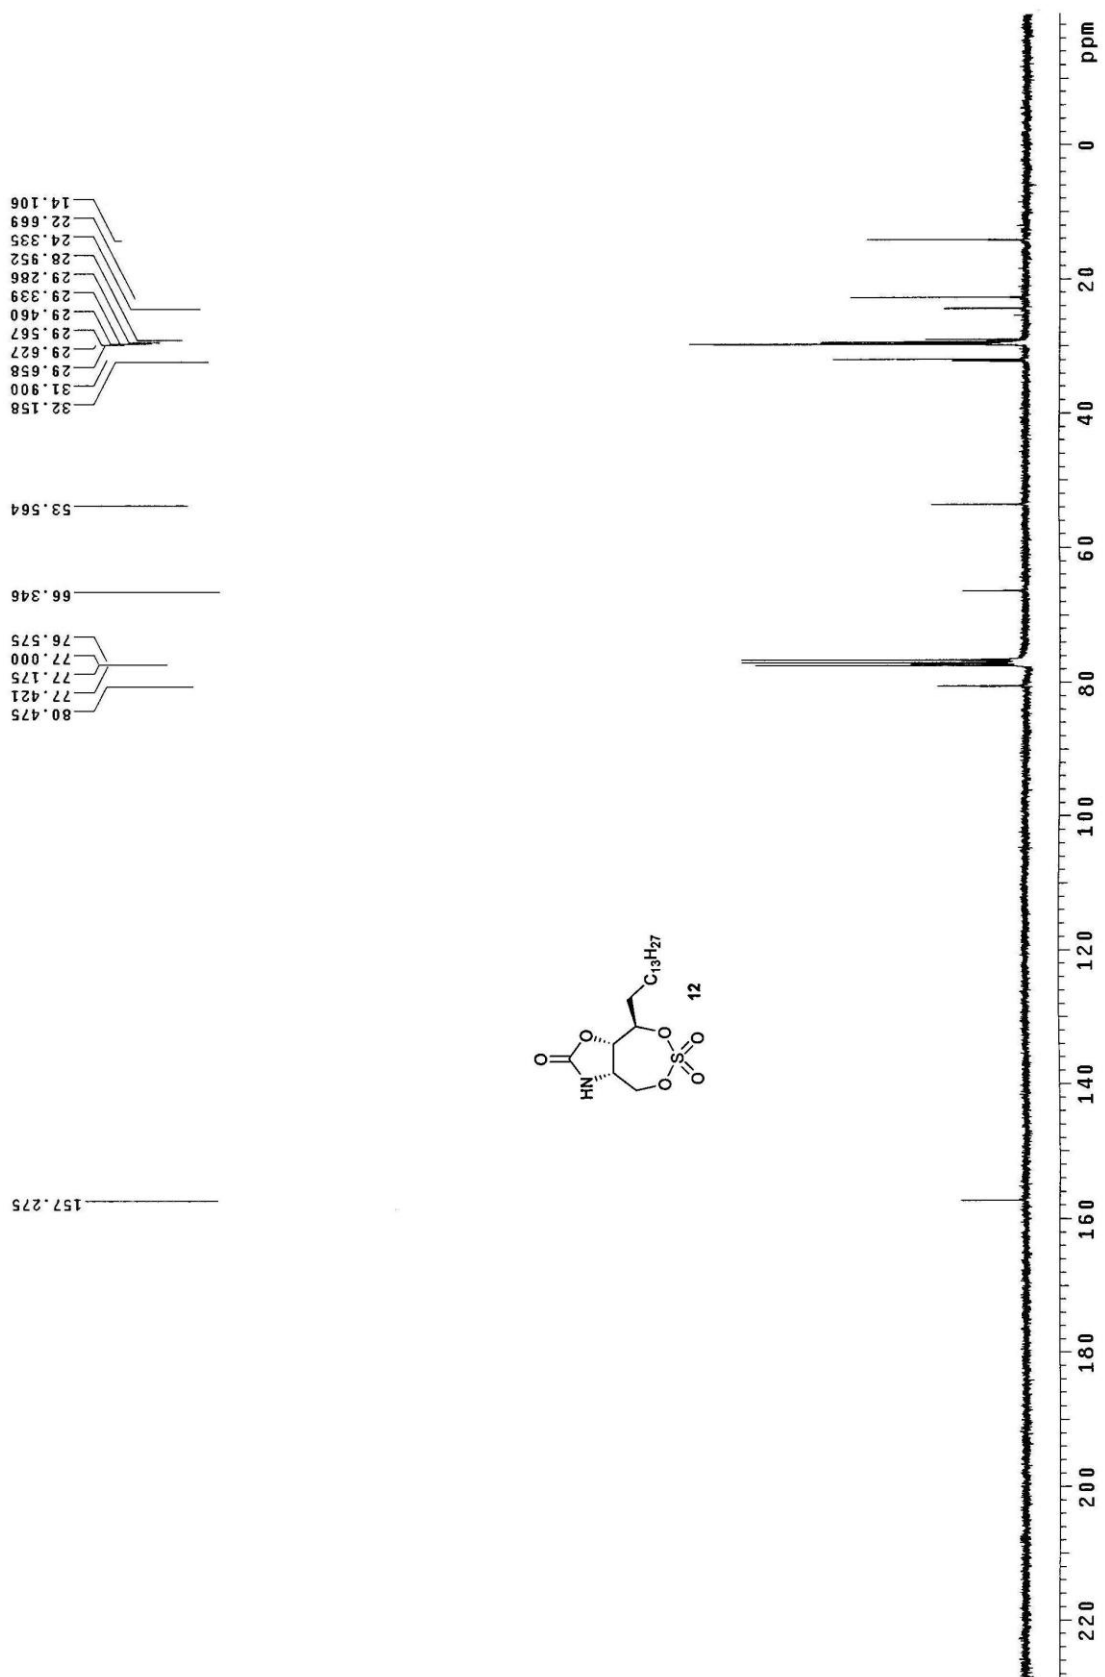

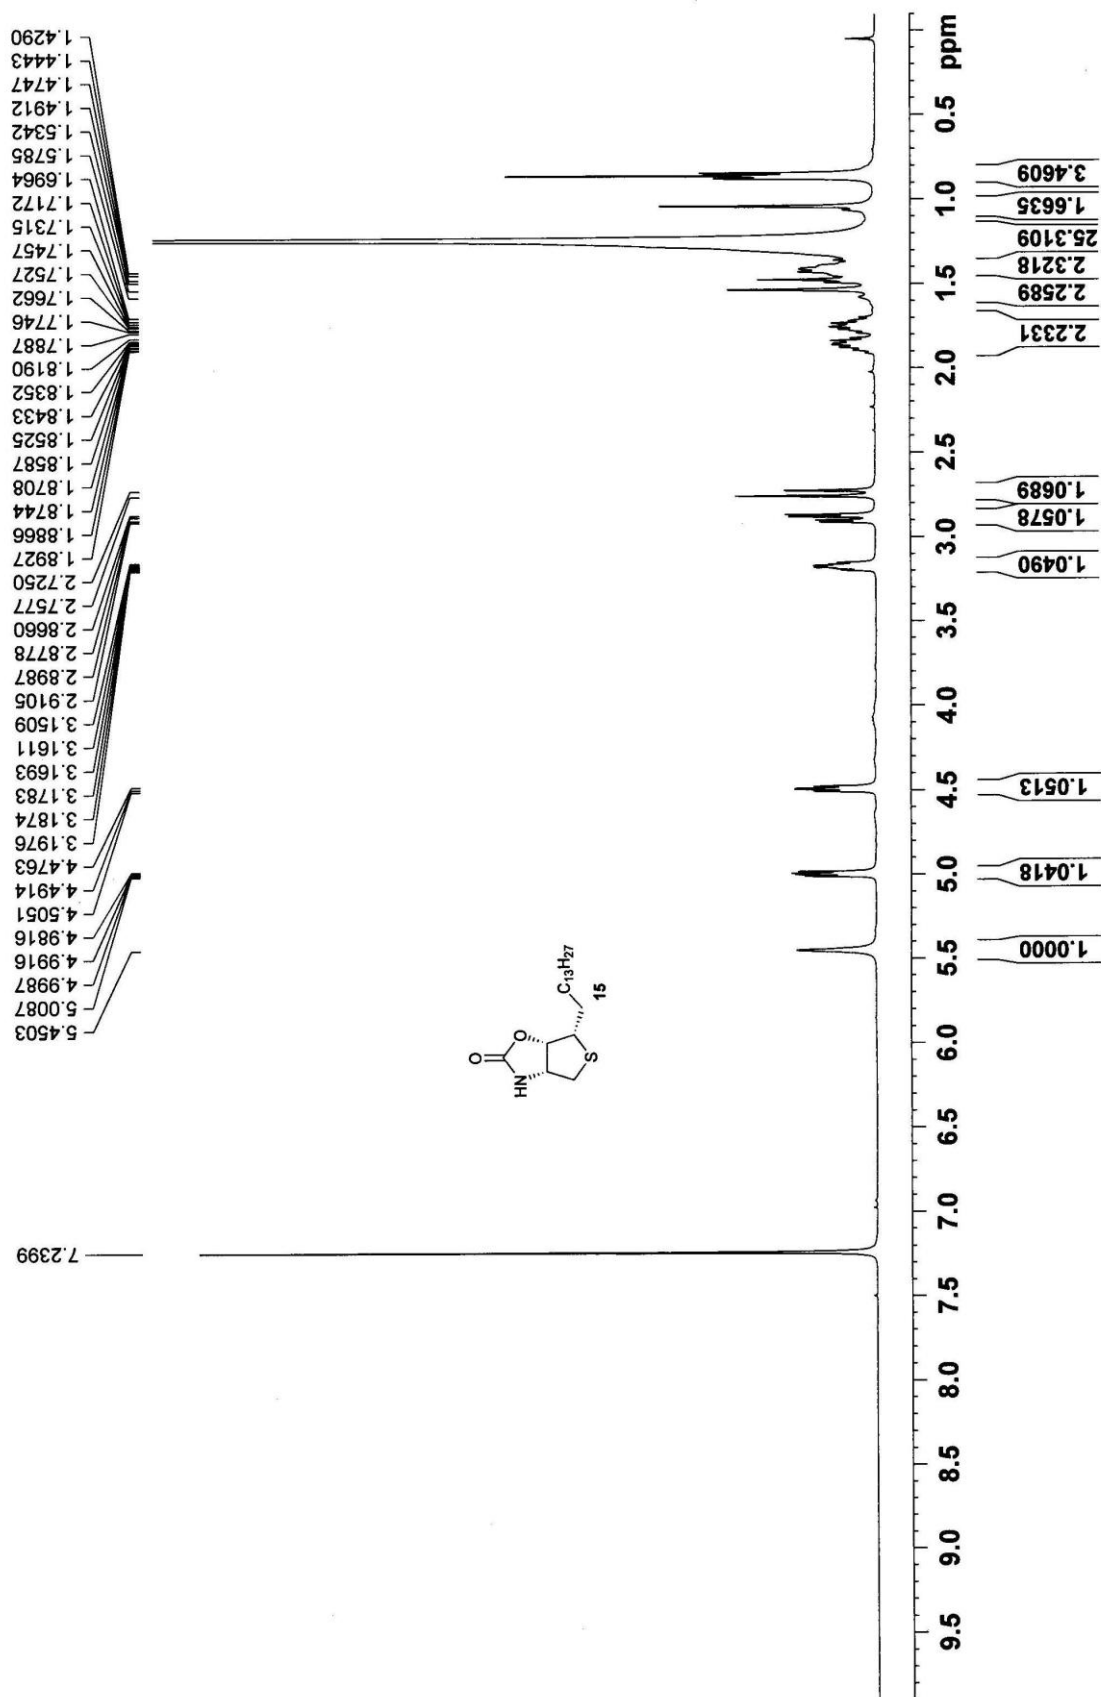

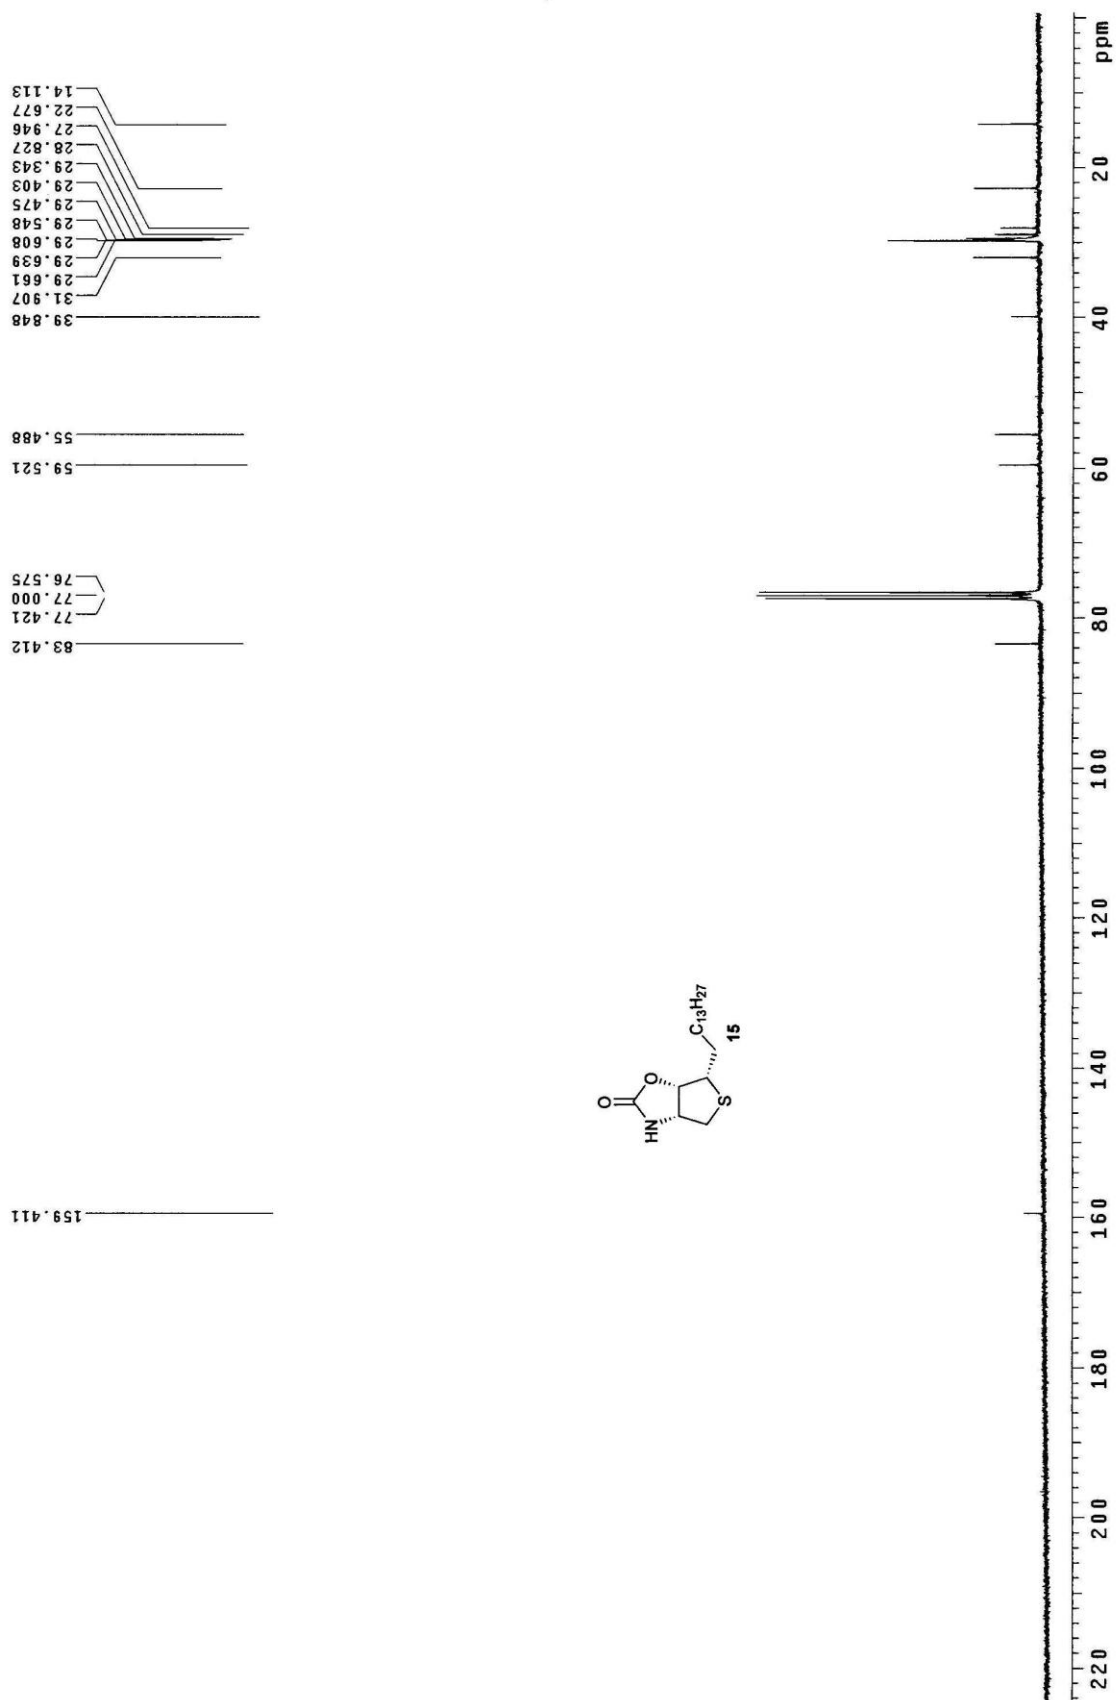



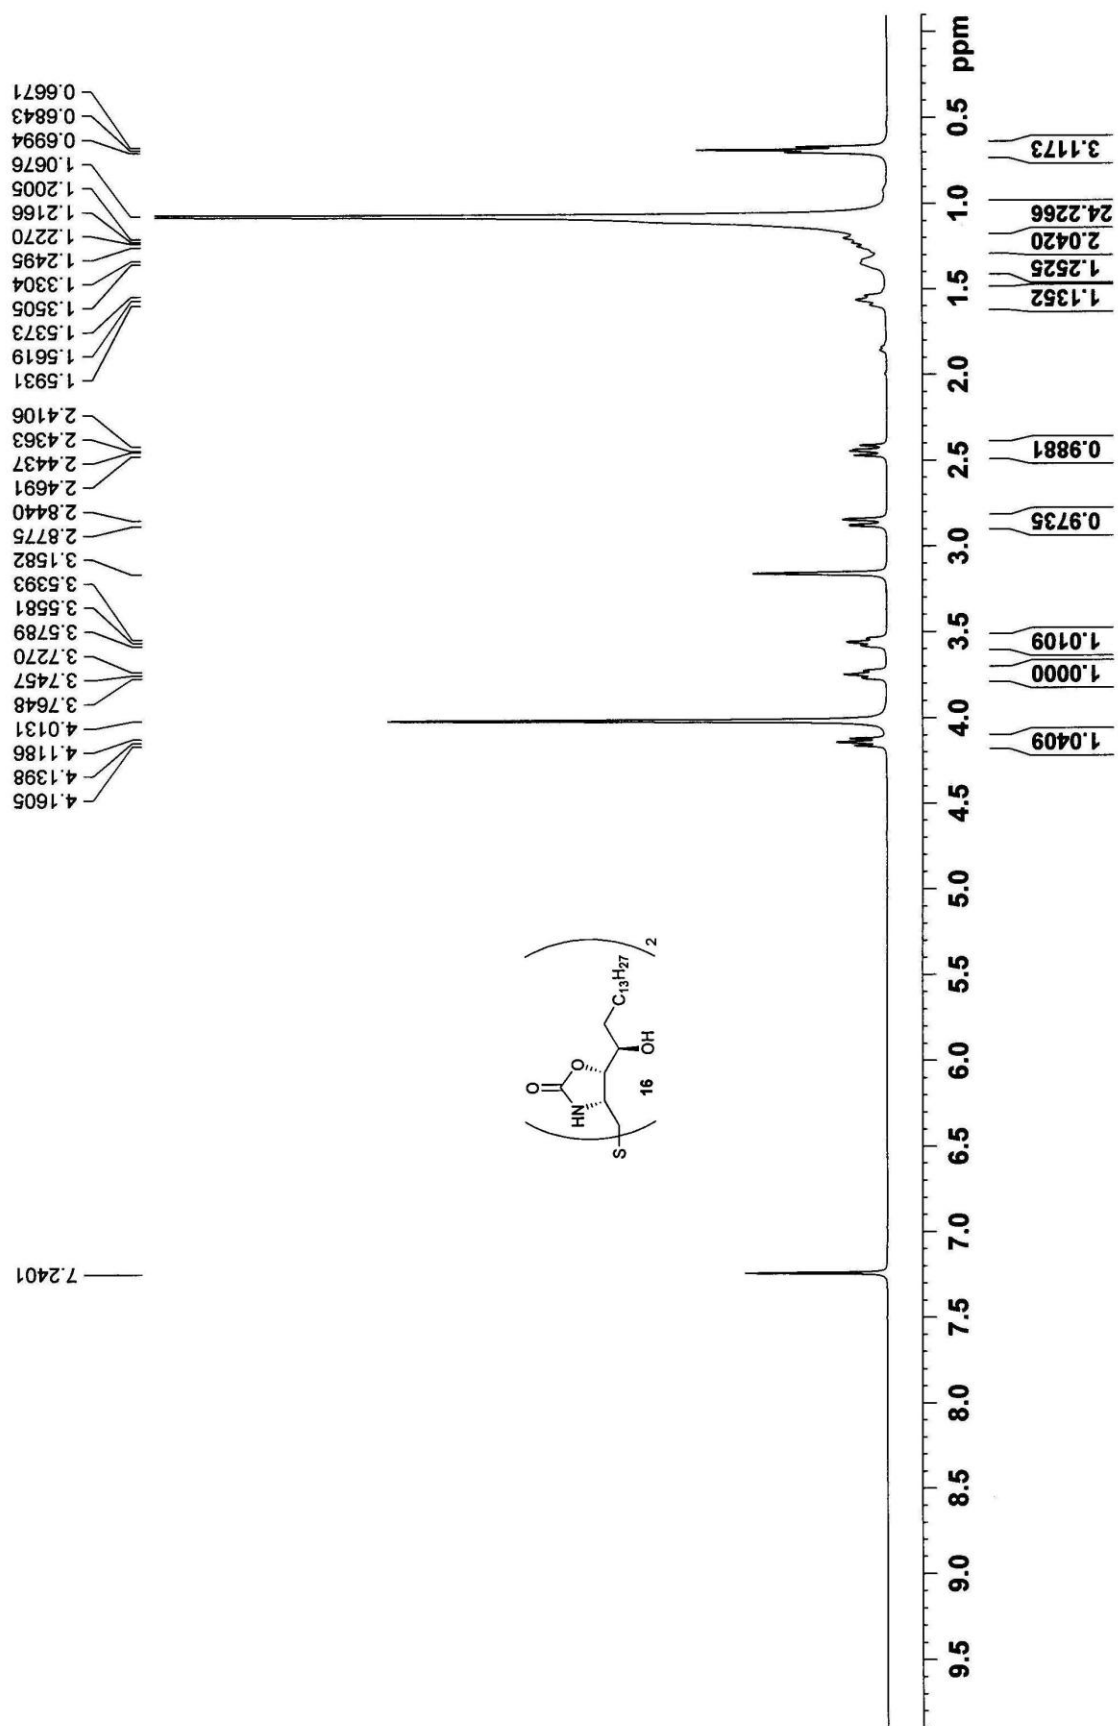

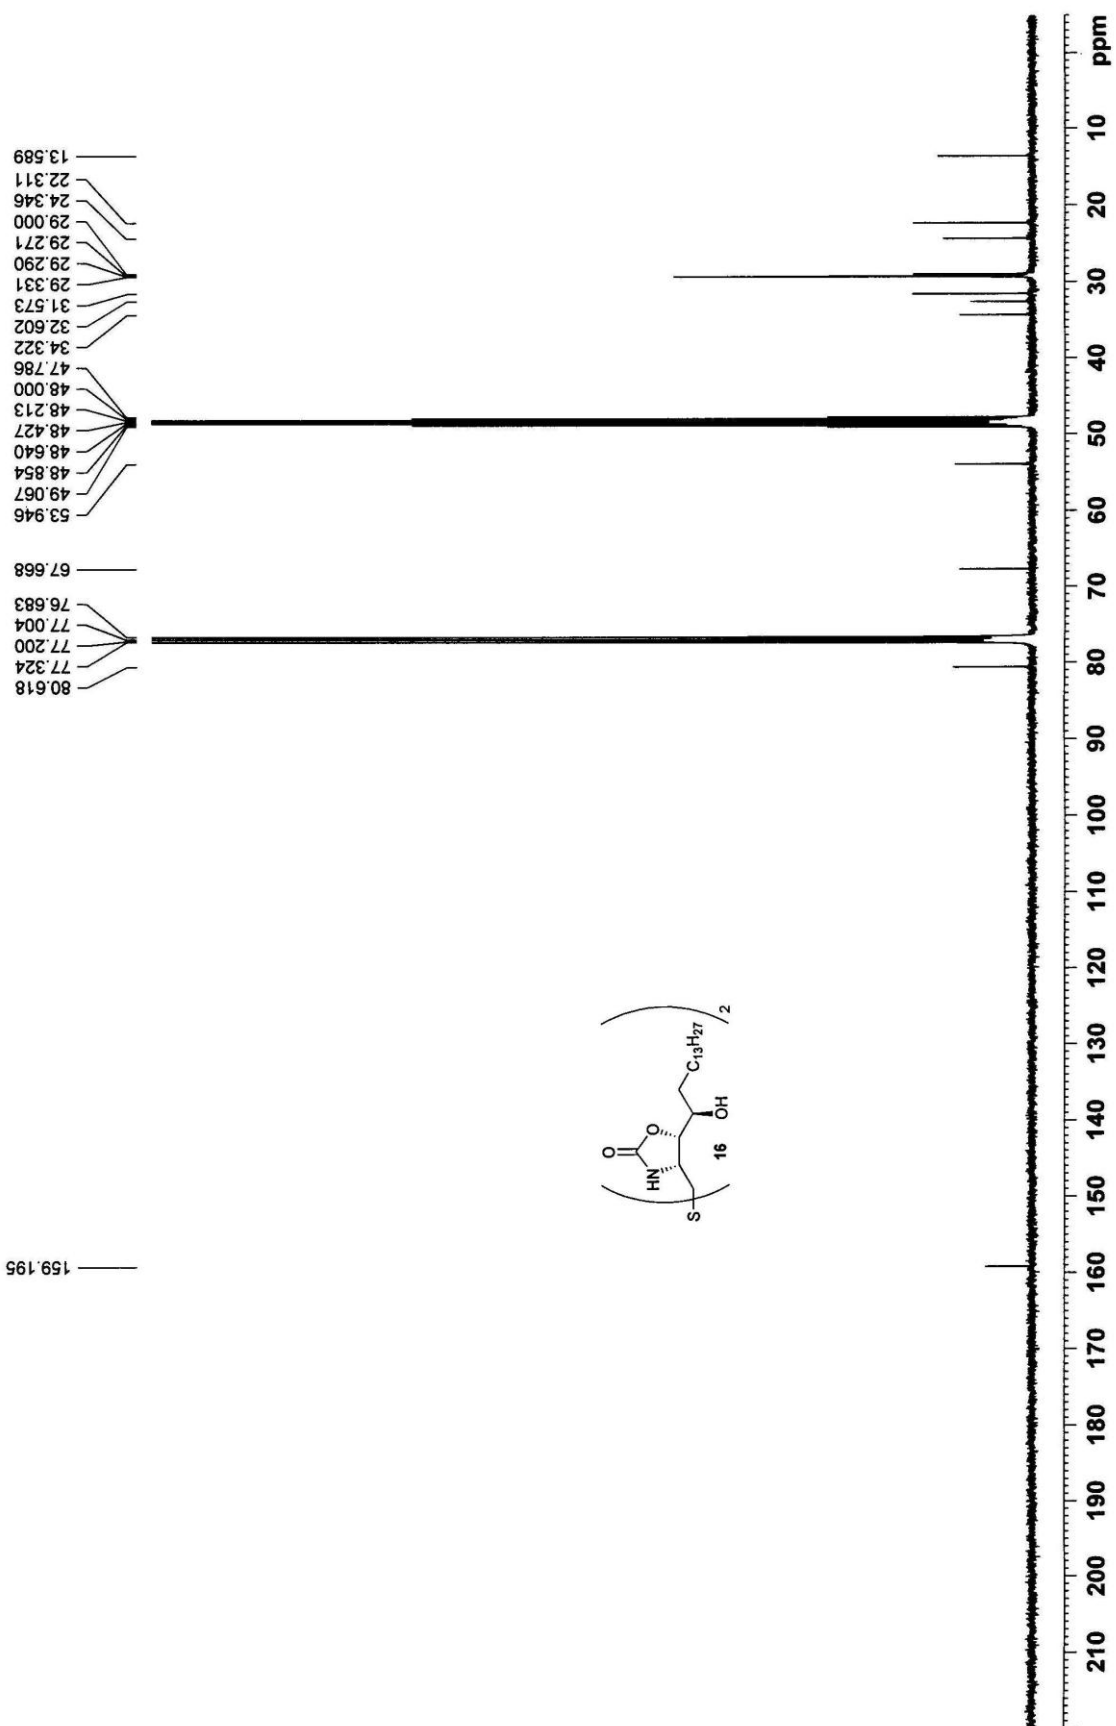

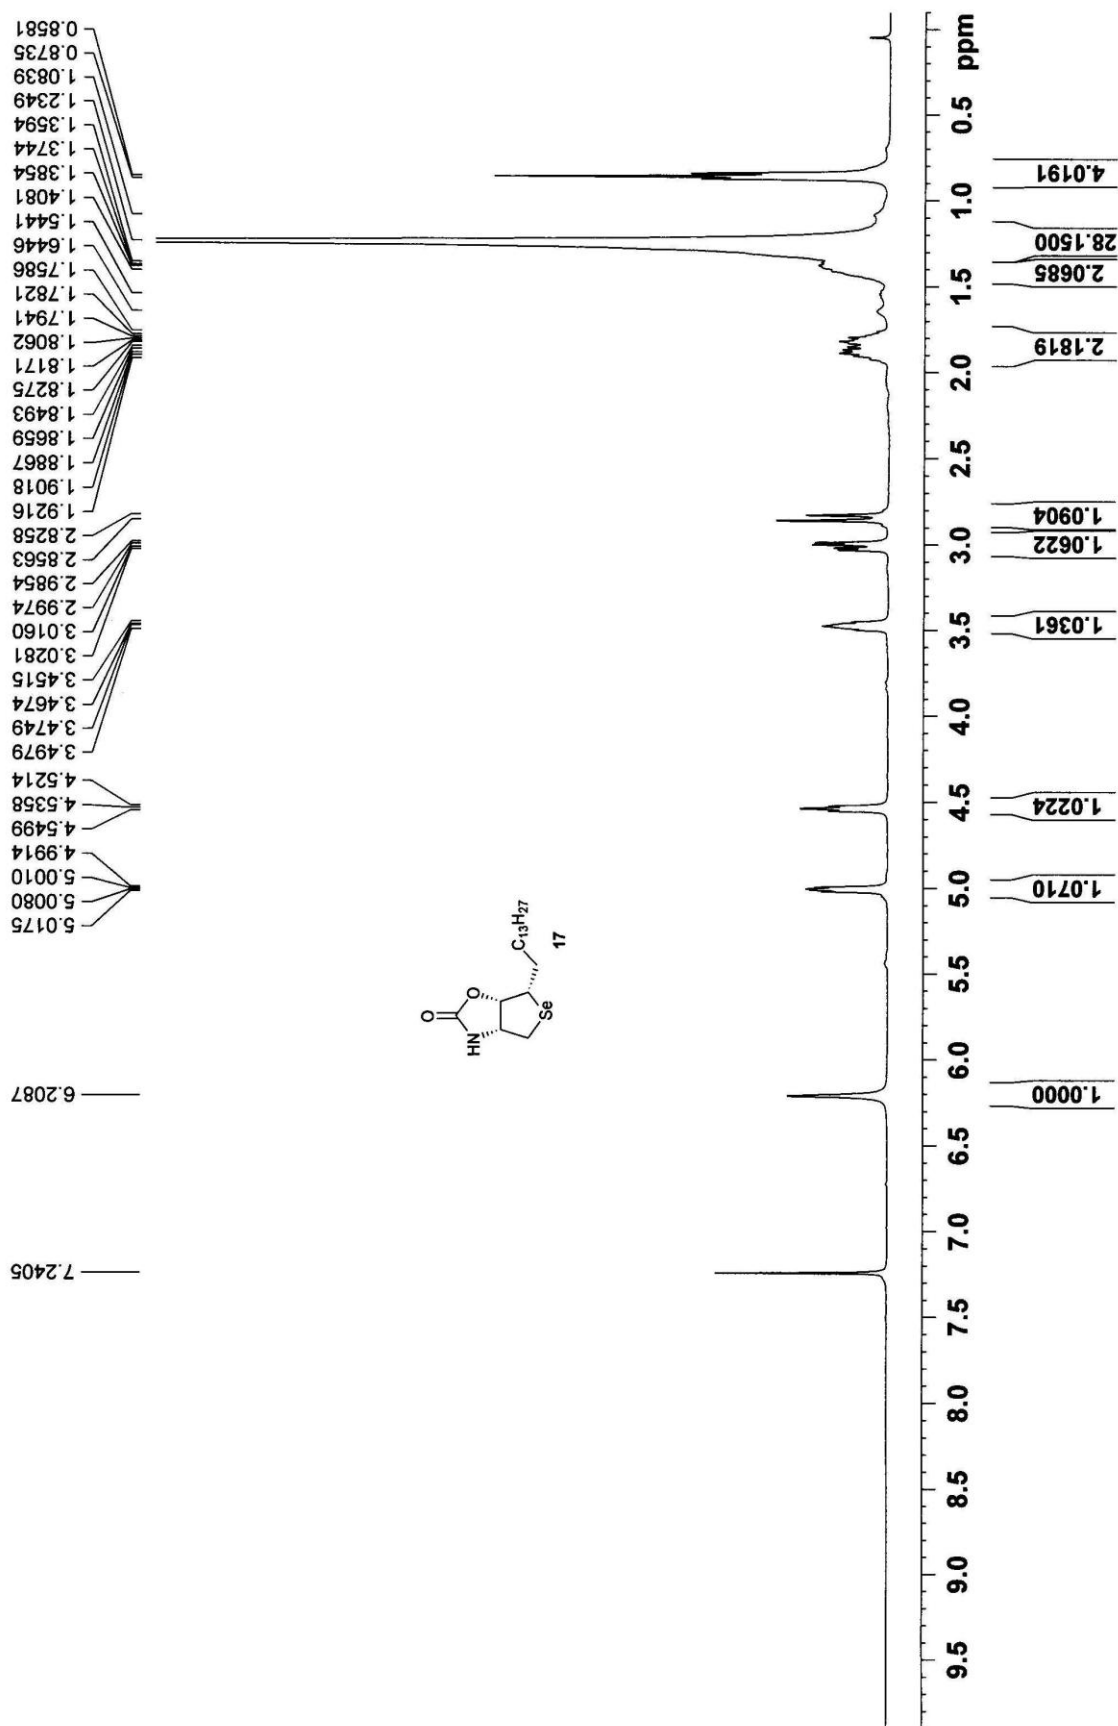

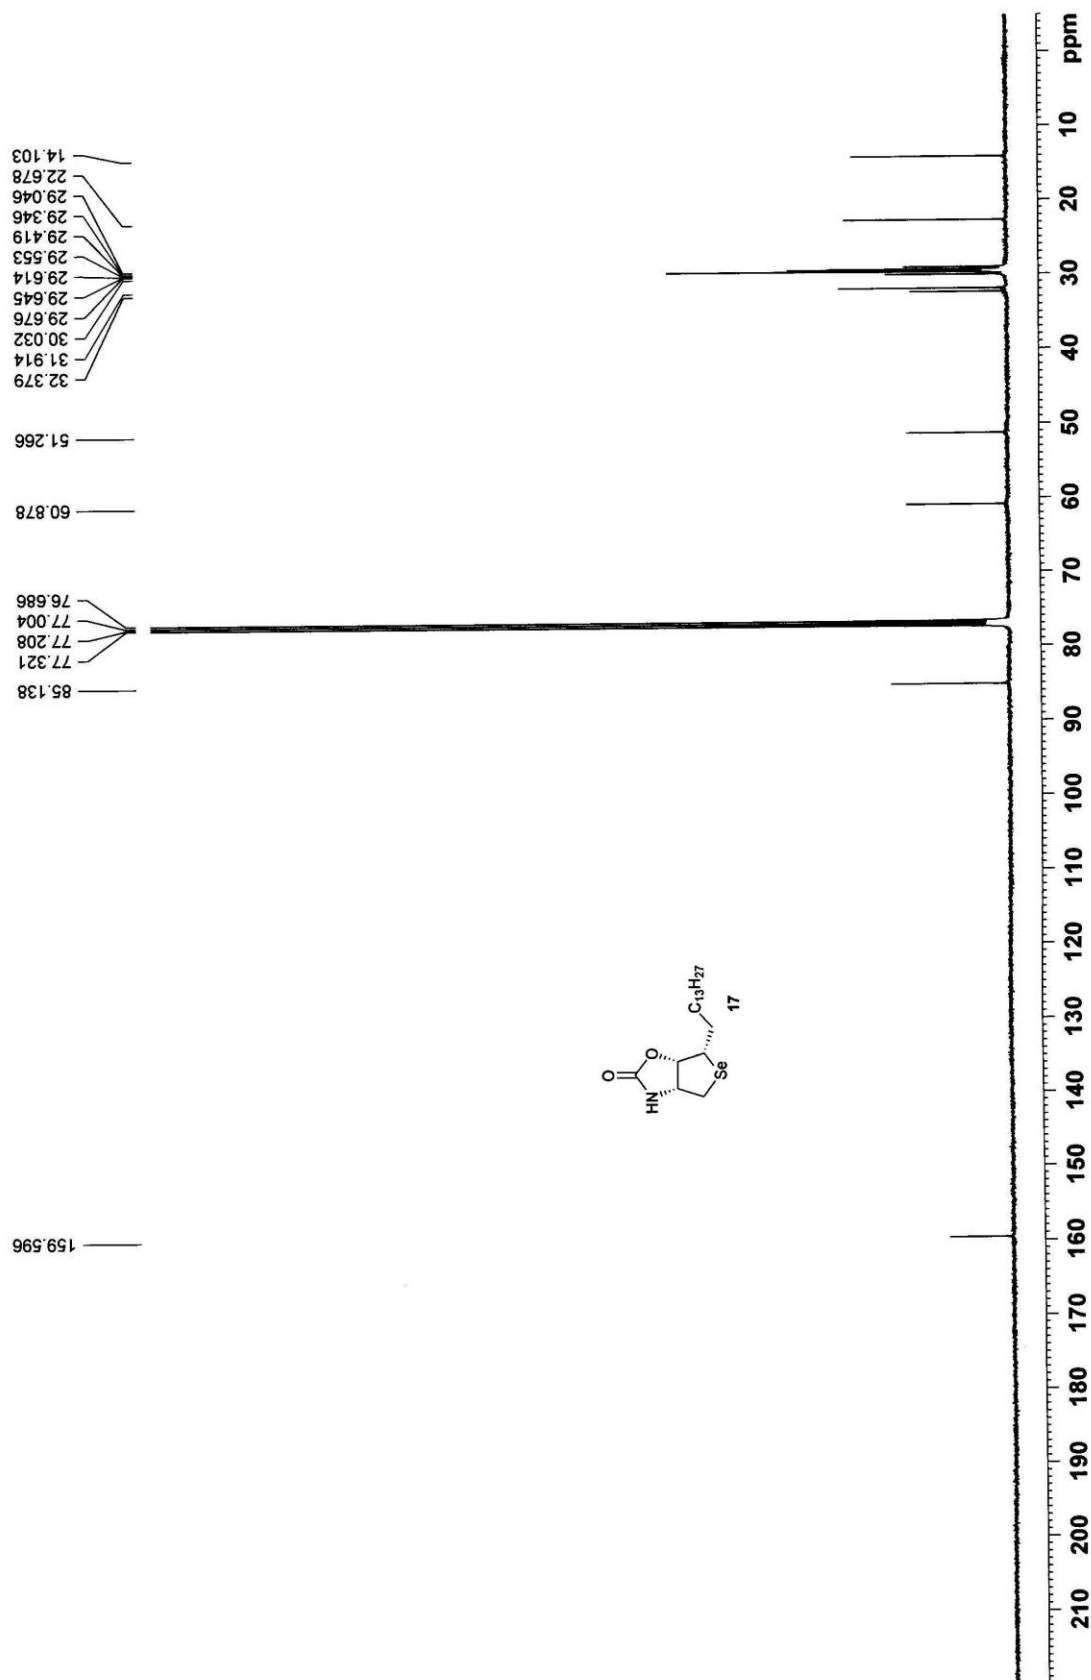

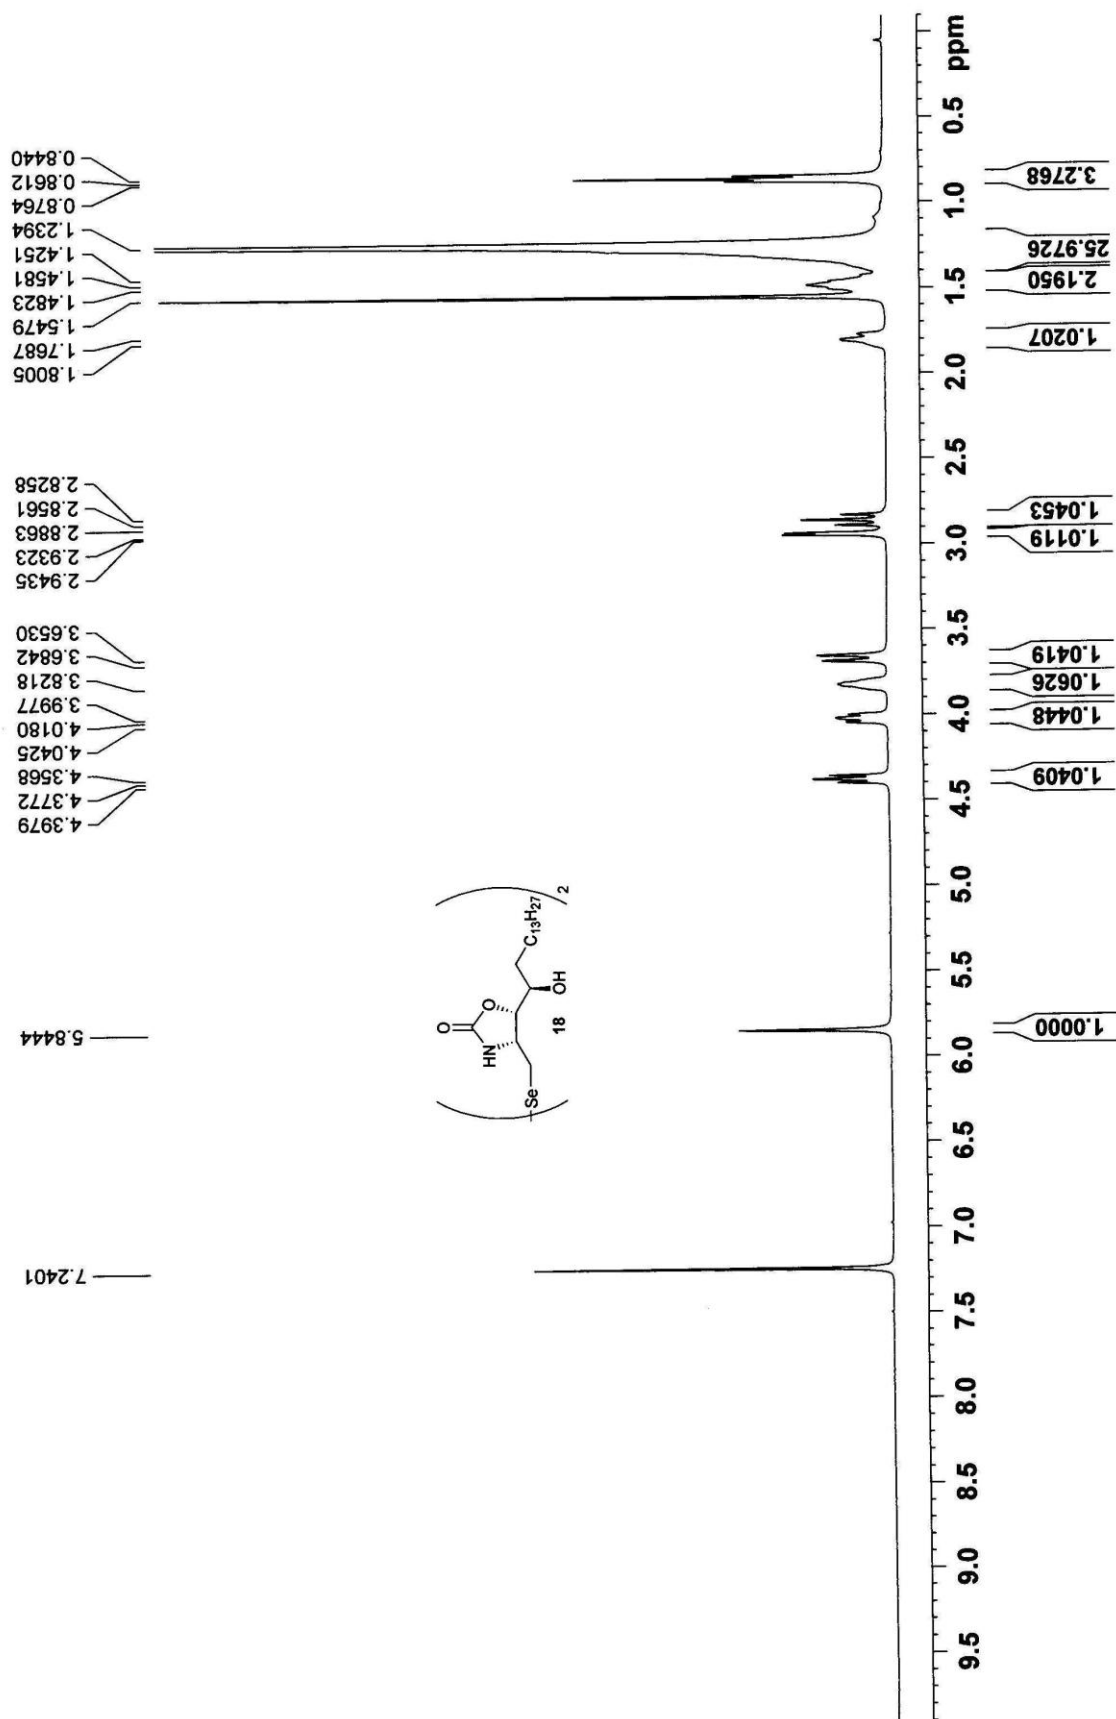

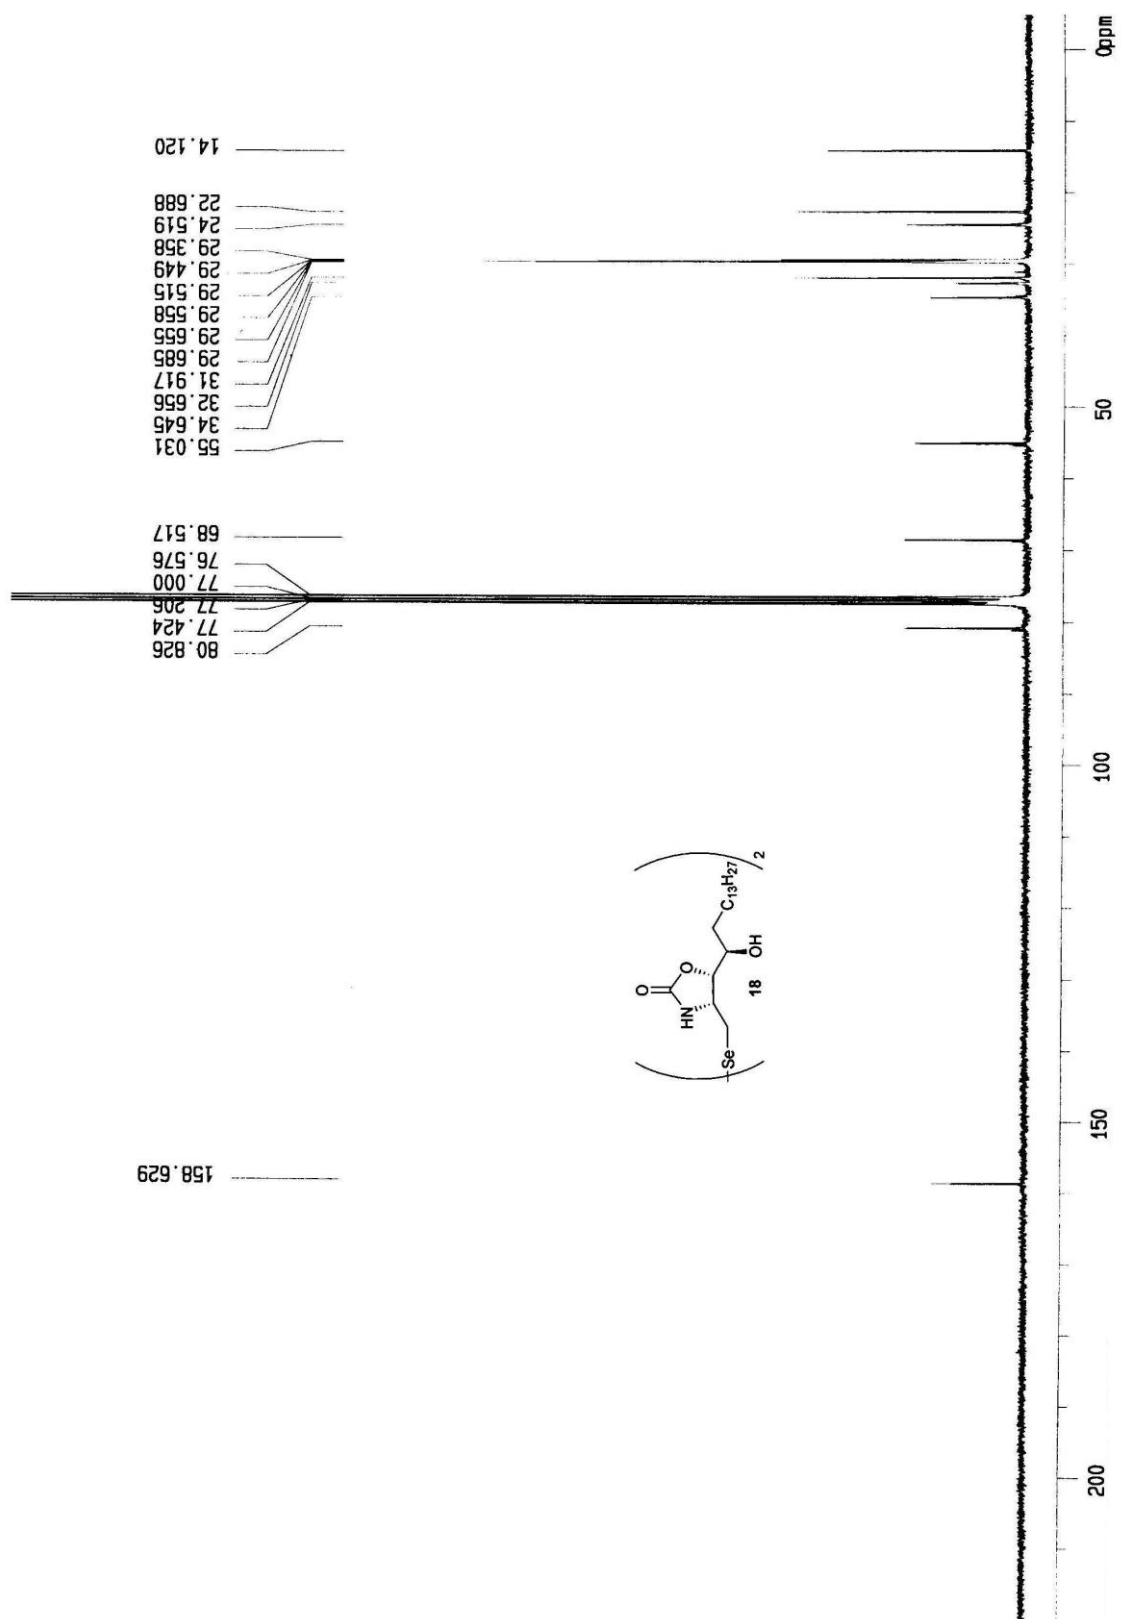

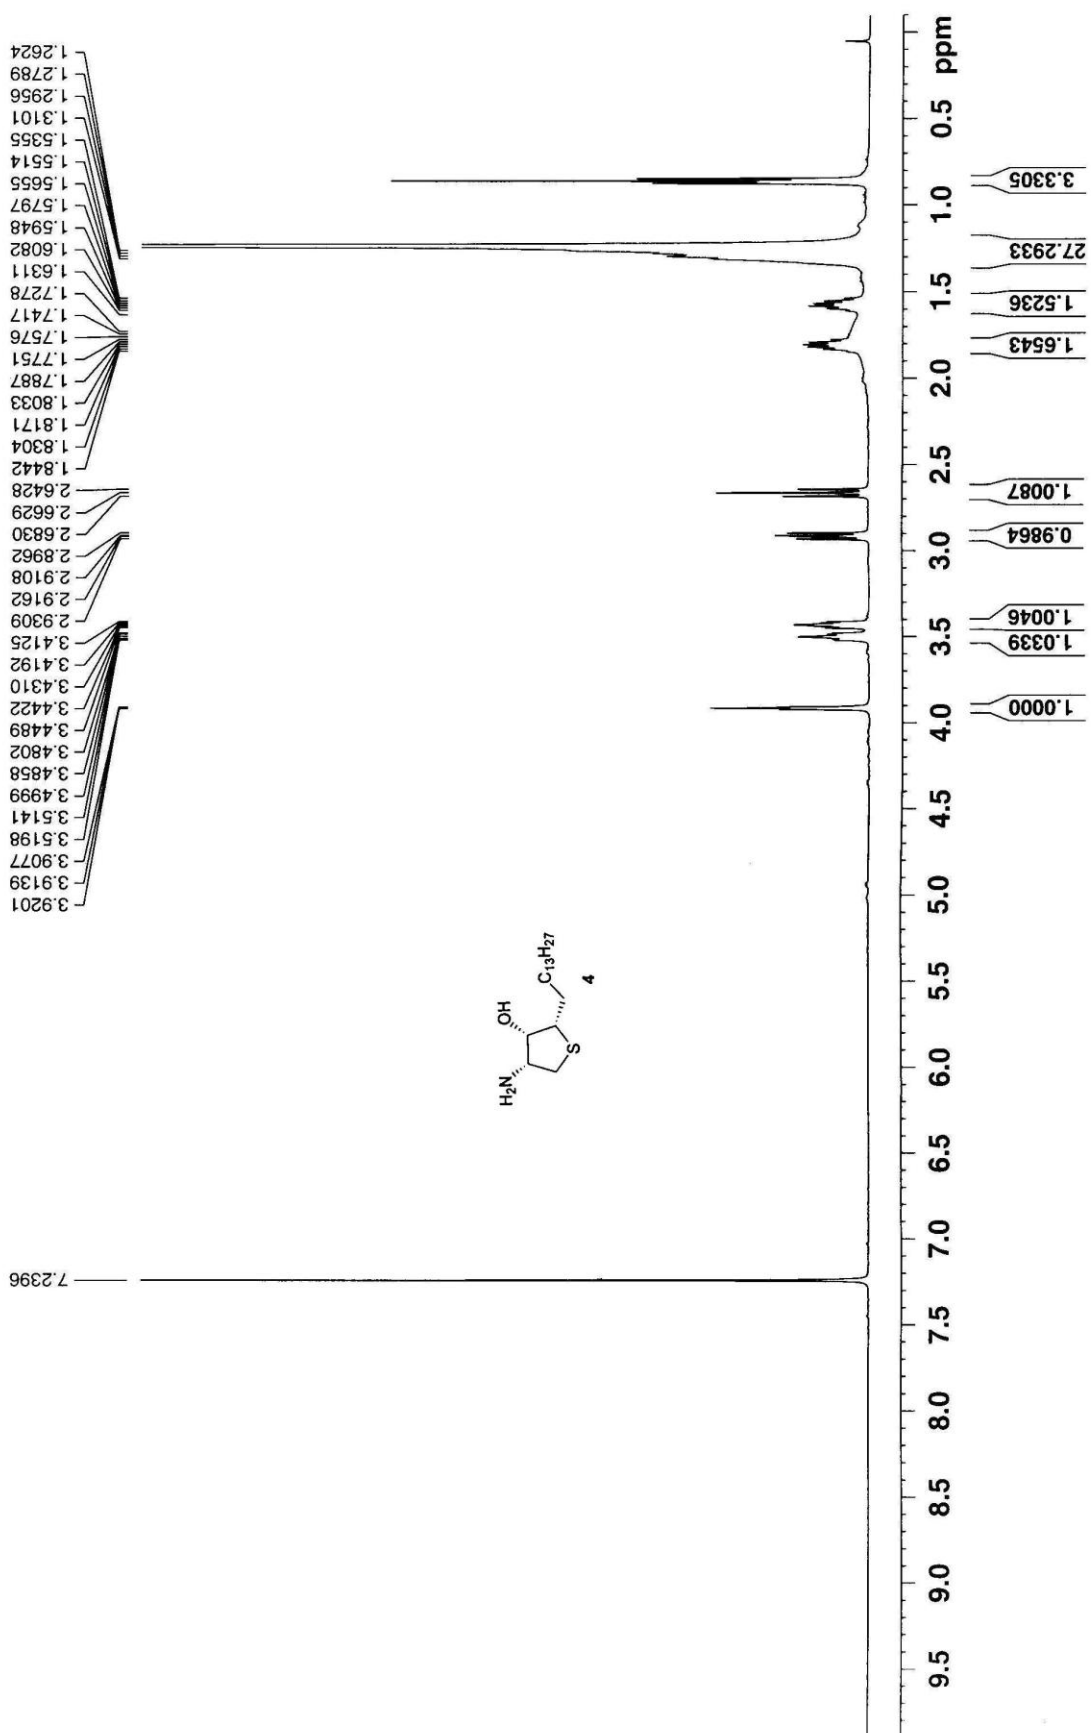

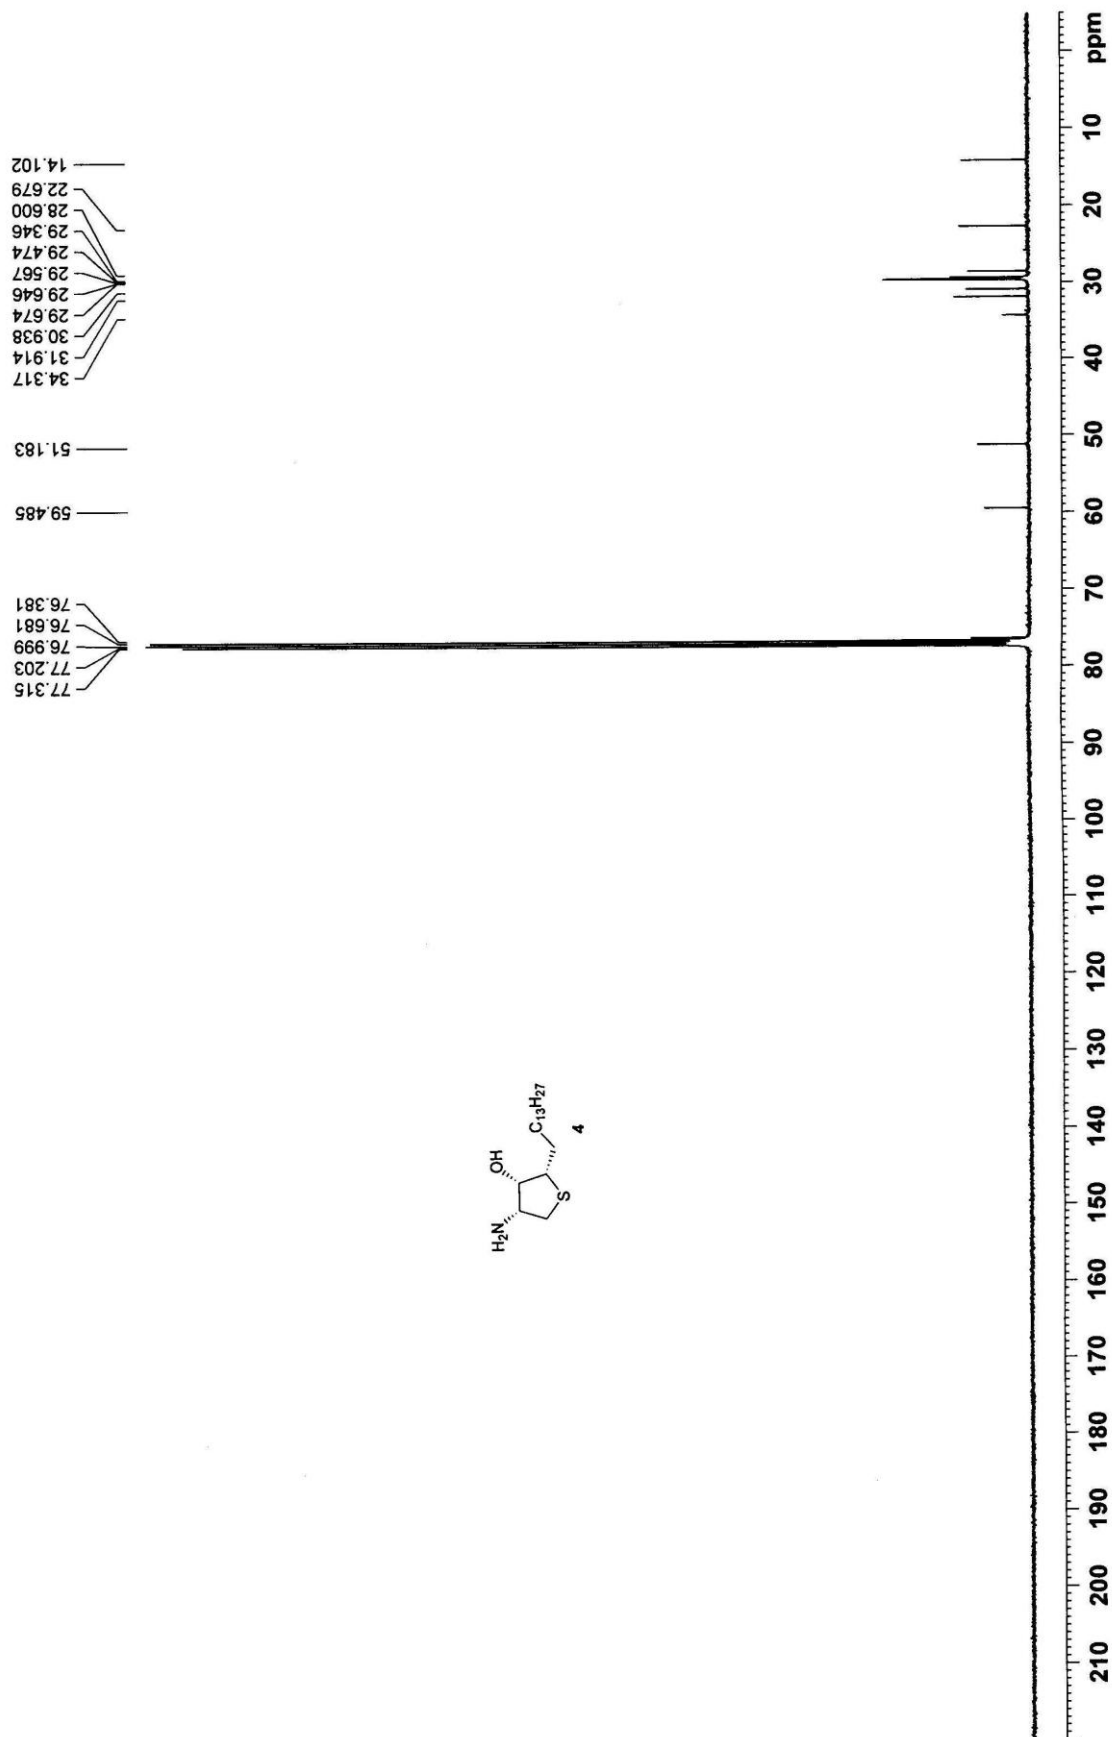



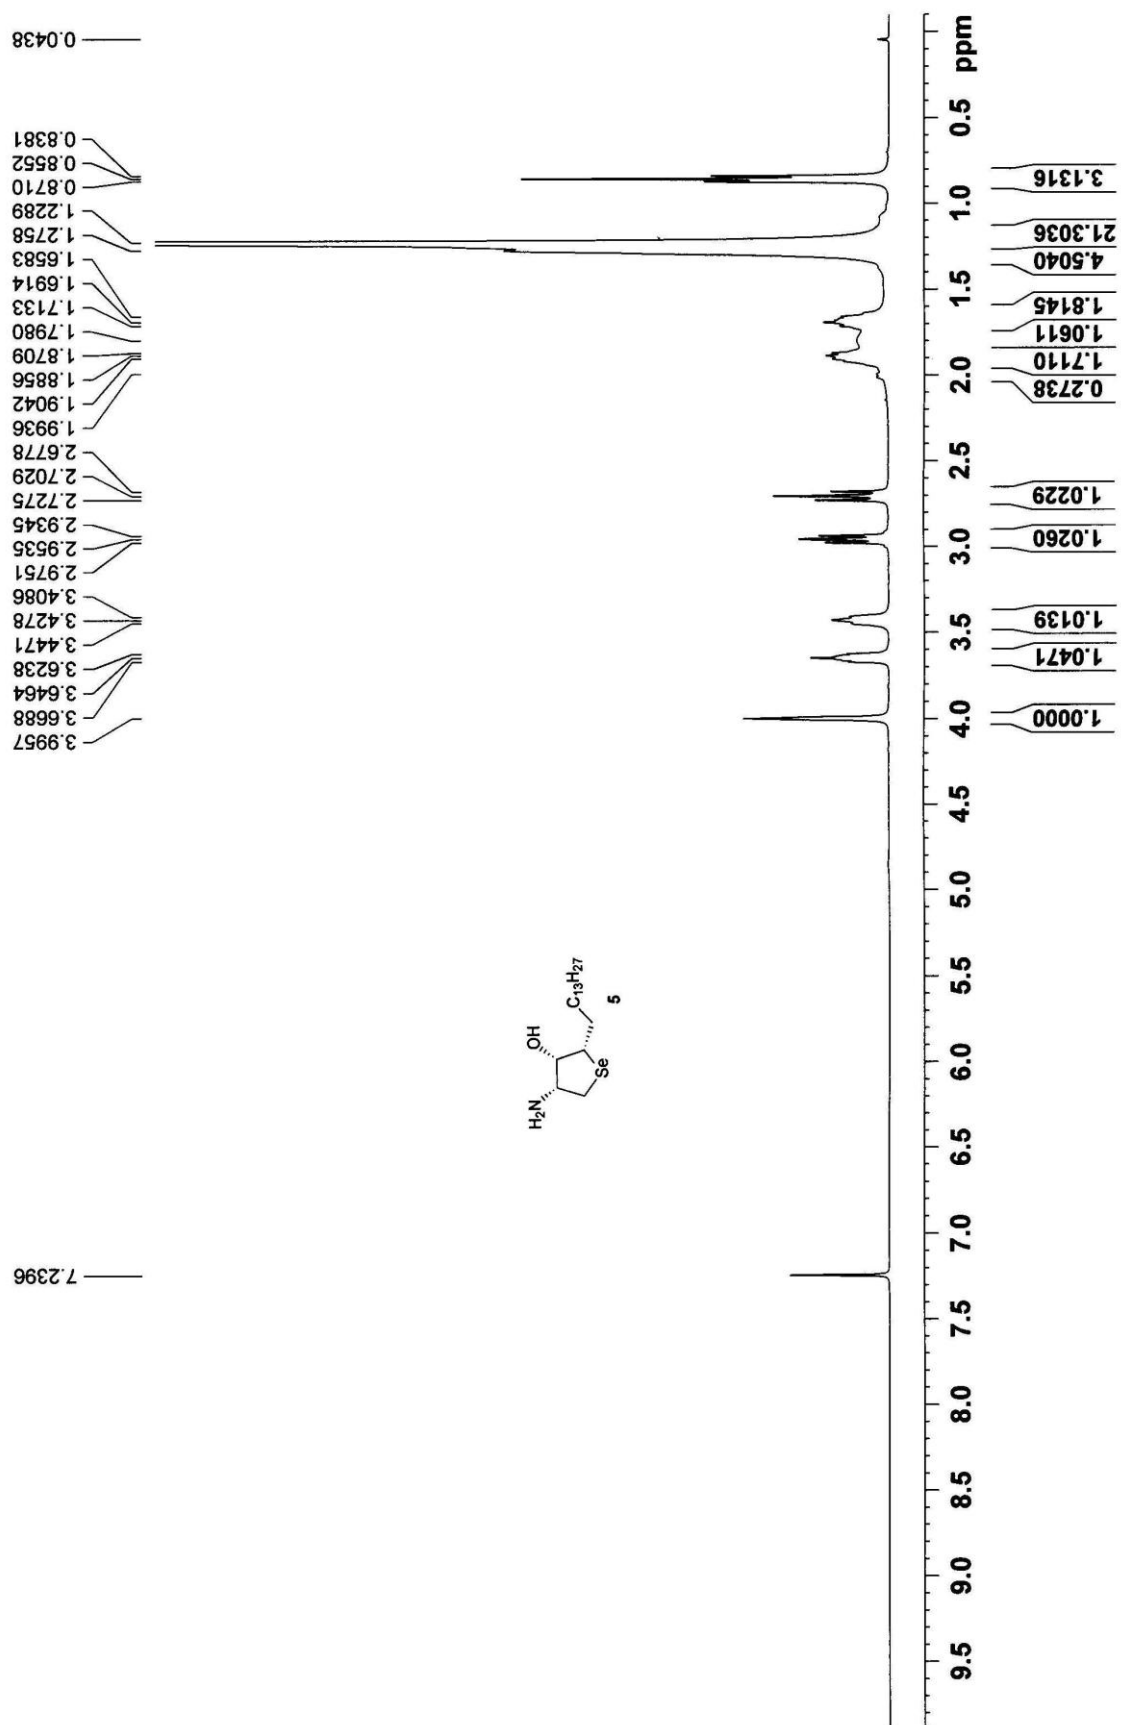

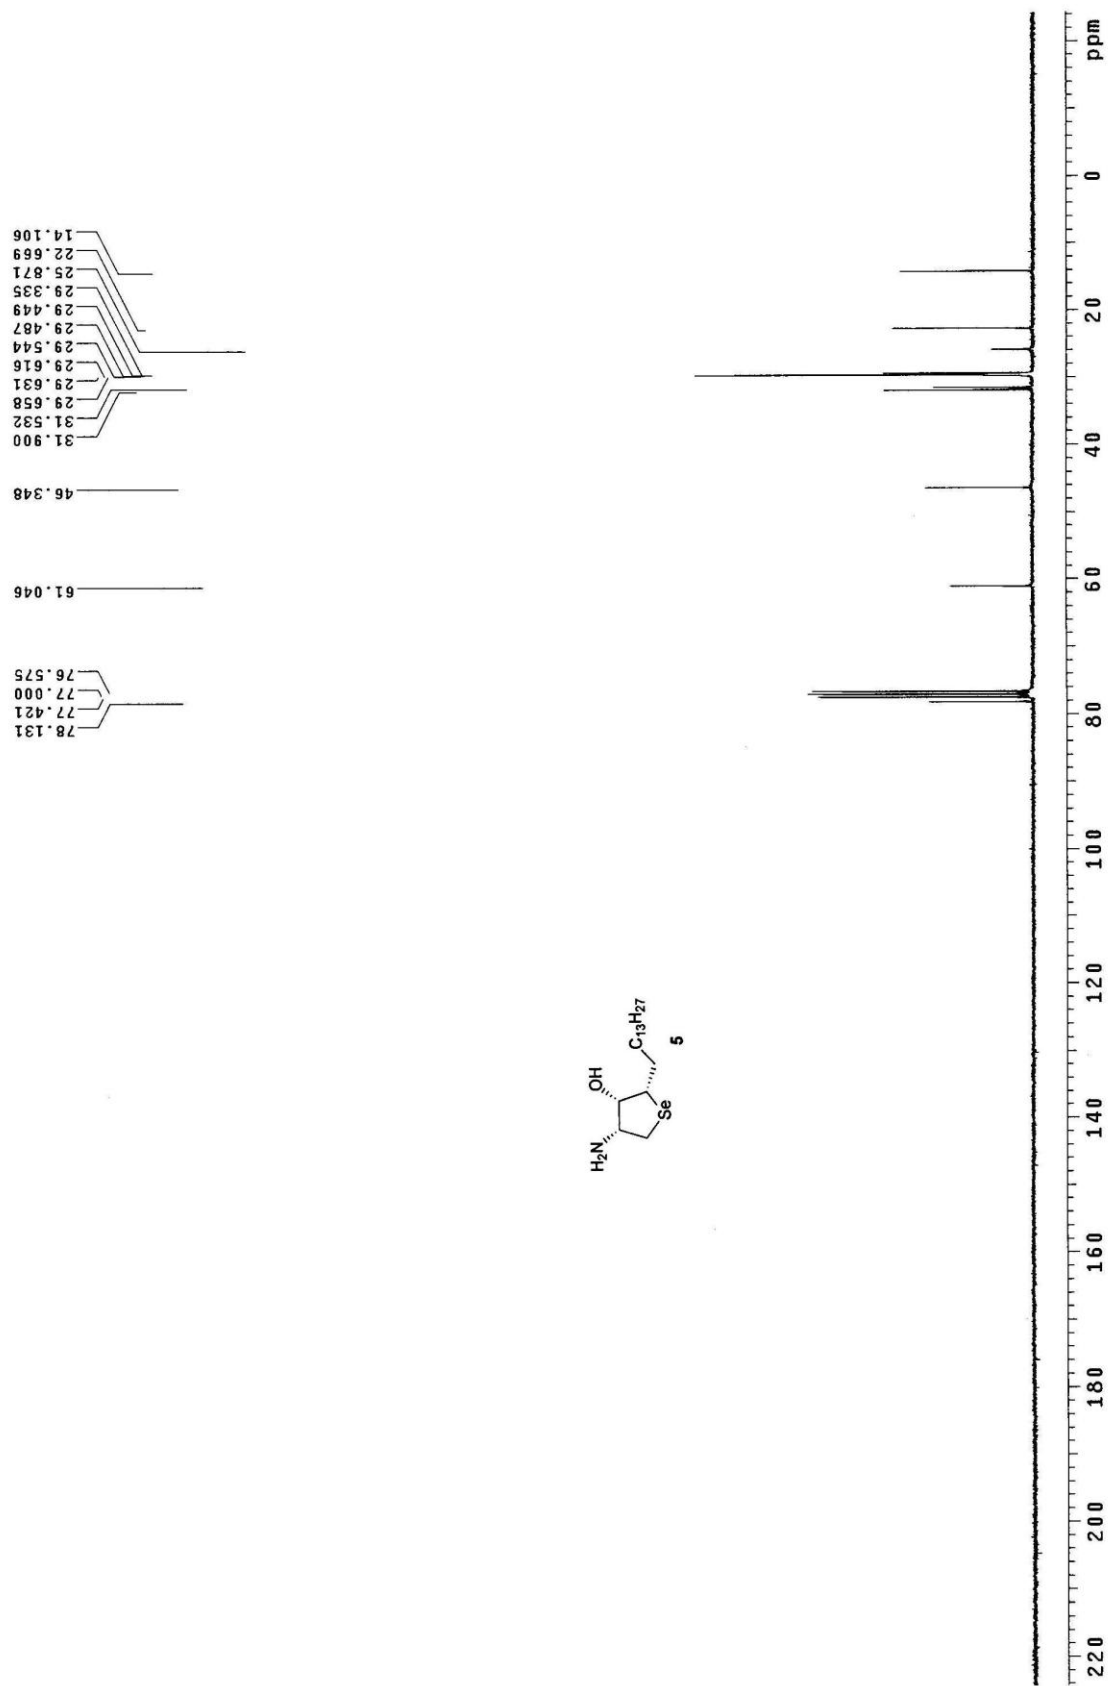

Supplement: c1ob05920c.pdf [file c1ob05920c.pdf]
